# Supplementary material
Source: publisher figshare collection journal article supplement (https://acs.figshare.com/ndownloader/files/4763011)
Supplement: Supplementary file 1 [file 4763011]

# Supporting Information Part 1

## Stereoselective Synthesis of 2,4,5-Trisubstituted Tetrahydropyrans using an Intramolecular Allylation Strategy

*Peter J. Jervis, Benson M. Kariuki and Liam R. Cox\**

School of Chemistry, The University of Birmingham, Edgbaston,

Birmingham, B15 2TT.

E-mail: [l.r.cox@bham.ac.uk](mailto:l.r.cox@bham.ac.uk)

# Table of Contents

## Supporting Information Part 1 (S1-S53)

|                                                                                                                                         |     |
|-----------------------------------------------------------------------------------------------------------------------------------------|-----|
| General Experimental                                                                                                                    | S6  |
| Preparation of propargyltrimethylsilane                                                                                                 | S9  |
| Titration of propargyl Grignard                                                                                                         | S10 |
| Preparation of Trimethylsilyl-but-2-yn-1-ol ( <b>9</b> )                                                                                | S10 |
| Preparation of 4-trimethylsilyl-but-2-ynyl-2',2',2'-trichloroacetimidate ( <b>10</b> )                                                  | S11 |
| General etherification procedure. Formation of <b>12</b>                                                                                | S12 |
| Preparation of ethyl 3-phenyl-3-(4'-trimethylsilyl-but-2'-ynyloxy)propionate ( <b>12a</b> )                                             | S12 |
| Preparation of ethyl 3-(4'-trimethylsilyl-but-2'-ynyl-oxy)heptanoate ( <b>12b</b> )                                                     | S13 |
| Preparation of ethyl 5-methyl-3-(4'-trimethylsilyl-but-2'-ynyloxy)hexanoate ( <b>12c</b> )                                              | S14 |
| Preparation ethyl 3-(4'-trimethylsilyl-but-2'-ynyloxy)butyrate ( <b>12d</b> )                                                           | S15 |
| Preparation of ethyl 5-benzyloxy-3-(4'-trimethylsilyl-but-2'-ynyloxy)pentanoate ( <b>12e</b> )                                          | S16 |
| Preparation of ethyl 4-( <i>tert</i> -butyl-diphenyl-silyloxy)-3-(4'-trimethylsilyl-but-2'-ynyloxy)butyrate ( <b>12f</b> )              | S17 |
| Preparation of ethyl 3-(furan-2'-yl)-3-(4''-trimethylsilyl-but-2''-ynyloxy)propionate ( <b>12g</b> )                                    | S18 |
| Preparation of ( <i>E</i> ) ethyl 5-phenyl-3-(4'-trimethylsilyl-but-2'-ynyloxy)pent-4-enoate ( <b>12h</b> )                             | S19 |
| Preparation of ( <i>Z</i> ) ethyl 3-phenyl-3-(4'-trimethylsilyl-but-2'-enyloxy)propionate ( <b>13a</b> )                                | S20 |
| Preparation of ( <i>Z</i> ) ethyl 3-(4'-trimethylsilyl-but-2'-enyloxy)heptanoate ( <b>13b</b> )                                         | S21 |
| Preparation of ( <i>Z</i> ) ethyl 5-methyl-3-(4'-trimethylsilyl-but-2'-enyloxy)hexanoate ( <b>13c</b> )                                 | S22 |
| Preparation of ( <i>Z</i> ) ethyl 3-(4'-trimethylsilyl-but-2'-enyloxy)butyrate ( <b>13d</b> )                                           | S23 |
| Preparation of ( <i>Z</i> ) ethyl 5-benzyloxy-3-(4'-trimethylsilyl-but-2'-enyloxy)pentanoate ( <b>13e</b> )                             | S24 |
| Preparation of ( <i>Z</i> ) ethyl 4-( <i>tert</i> -butyl-diphenyl-silyloxy)-3-(4'-trimethylsilyl-but-2'-enyloxy)butyrate ( <b>13f</b> ) | S25 |
| Preparation of ( <i>Z</i> ) ethyl 3-(furan-2'-yl)-3-(4''-trimethylsilyl-but-2''-enyloxy)propionate ( <b>13g</b> )                       | S27 |
| Preparation of (4 <i>E</i> , 2' <i>Z</i> ) ethyl 5-phenyl-3-(4'-trimethylsilyl-but-2'-enyloxy)pent-4-enoate ( <b>13h</b> )              | S28 |
| General procedure for DIBALH reduction: formation of <b>7</b>                                                                           | S29 |
| Preparation of ( <i>Z</i> ) 3-phenyl-3-(4'-trimethylsilyl-but-2'-enyloxy)propionaldehyde ( <b>7a</b> )                                  | S29 |
| Preparation of ( <i>Z</i> ) 3-(4'-trimethylsilyl-but-2'-enyloxy)heptanal ( <b>7b</b> )                                                  | S30 |
| Preparation of ( <i>Z</i> ) 5-methyl-3-(4'-trimethylsilyl-but-2'-enyloxy)hexanal ( <b>7c</b> )                                          | S31 |

|                                                                                                                                                              |     |
|--------------------------------------------------------------------------------------------------------------------------------------------------------------|-----|
| Preparation of (Z) 3-(4'-trimethylsilanyl-but-2'-enyloxy)butanal ( <b>7d</b> )                                                                               | S32 |
| Preparation of (Z) 5-benzyloxy-3-(4'-trimethylsilanyl-but-2'-enyloxy)pentanal ( <b>7e</b> )                                                                  | S33 |
| Preparation of (Z) 4-( <i>tert</i> -butyl-diphenyl-silanyloxy)-3-(4'-trimethylsilanyl-but-2'-enyloxy)butanal ( <b>7f</b> )                                   | S34 |
| Preparation of (Z) 3-furan-2'-yl-3-(4''-trimethylsilanyl-but-2''-enyloxy)propionaldehyde ( <b>7g</b> )                                                       | S35 |
| Preparation of (4 <i>E</i> , 2' <i>Z</i> ) 5-phenyl-3-(4'-trimethylsilanyl-but-2'-enyloxy)pent-4-enal ( <b>7h</b> )                                          | S36 |
| General procedure for allylation reactions: formation of <b>14</b>                                                                                           | S37 |
| Preparation of (2 <i>S</i> *, 4 <i>R</i> *, 5 <i>S</i> *) 4-hydroxy-2-phenyl-5-vinyl-tetrahydropyran ( <b>14a</b> )                                          | S38 |
| Preparation of (2 <i>R</i> *, 4 <i>R</i> *, 5 <i>S</i> *) 2-butyl-4-hydroxy-5-vinyl-tetrahydropyran ( <b>14b</b> )                                           | S40 |
| Preparation of (2 <i>R</i> *, 4 <i>R</i> *, 5 <i>S</i> *) 2- <i>iso</i> -butyl-4-hydroxy-5-vinyl-tetrahydropyran ( <b>14c</b> )                              | S41 |
| Preparation of (2 <i>R</i> *, 4 <i>R</i> *, 5 <i>S</i> *) 4-hydroxy-2-methyl-5-vinyl-tetrahydropyran ( <b>14d</b> )                                          | S42 |
| Preparation of (2 <i>R</i> *, 4 <i>R</i> *, 5 <i>S</i> *) 2-(2-benzyloxyethyl)-4-hydroxy-5-vinyl-tetrahydropyran ( <b>14e</b> )                              | S43 |
| Preparation of (2 <i>S</i> *, 4 <i>R</i> *, 5 <i>S</i> *) 2-( <i>tert</i> -butyl-diphenyl-silanyloxymethyl)-4-hydroxy-5-vinyl-tetrahydropyran ( <b>14f</b> ) | S44 |
| Preparation of (2 <i>S</i> *, 4 <i>R</i> *, 5 <i>S</i> *) 2-(furan-2'-yl)-4-hydroxy-5-vinyl-tetrahydropyran ( <b>14g</b> )                                   | S45 |
| Preparation of ( <i>E</i> , 2 <i>S</i> *, 4 <i>R</i> *, 5 <i>R</i> *) 4-hydroxy-2-styryl-5-vinyl-tetrahydropyran ( <b>14h</b> )                              | S46 |
| Preparation of (2 <i>S</i> *, 4 <i>S</i> *, 5 <i>S</i> *) 4-hydroxy-2-phenyl-5-vinyl-tetrahydropyran ( <b>15a</b> )                                          | S48 |
| Preparation of (2 <i>R</i> *, 4 <i>S</i> *, 5 <i>S</i> *) 2-butyl-4-hydroxy-5-vinyl-tetrahydropyran ( <b>15b</b> )                                           | S49 |
| Preparation of 3-phenyl-3-(4-trimethylsilanyl-but-2-ynyloxy)propionaldehyde ( <b>16a</b> )                                                                   | S50 |
| Preparation of 3-(4-trimethylsilanyl-but-2-ynyloxy)heptanal ( <b>16b</b> )                                                                                   | S51 |
| Preparation of (2 <i>S</i> *, 4 <i>R</i> *) 4-hydroxy-2-phenyl-5-vinylidene-tetrahydropyran ( <b>17a</b> )                                                   | S52 |
| Preparation of (2 <i>R</i> *, 4 <i>R</i> *) 2-butyl-4-hydroxy-5-vinylidene-tetrahydropyran ( <b>17b</b> )                                                    | S53 |

## Supporting Information Part 2 (S54-S178) [<sup>1</sup>H-NMR and <sup>13</sup>C-NMR data]

|                     |     |
|---------------------|-----|
| Data for <b>14a</b> | S55 |
| Data for <b>14b</b> | S65 |
| Data for <b>14c</b> | S74 |
| Data for <b>14d</b> | S76 |
| Data for <b>14e</b> | S78 |
| Data for <b>14f</b> | S80 |
| Data for <b>14g</b> | S82 |

|                     |      |
|---------------------|------|
| Data for <b>14h</b> | S95  |
| Data for <b>15a</b> | S110 |
| Data for <b>15b</b> | S112 |
| Data for <b>17a</b> | S114 |
| Data for <b>17b</b> | S122 |
| Data for <b>7a</b>  | S124 |
| Data for <b>7b</b>  | S126 |
| Data for <b>7c</b>  | S128 |
| Data for <b>7d</b>  | S130 |
| Data for <b>7e</b>  | S132 |
| Data for <b>7f</b>  | S134 |
| Data for <b>7g</b>  | S136 |
| Data for <b>7h</b>  | S138 |
| Data for <b>16a</b> | S140 |
| Data for <b>16b</b> | S142 |
| Data for <b>13a</b> | S144 |
| Data for <b>13b</b> | S146 |
| Data for <b>13c</b> | S148 |
| Data for <b>13d</b> | S150 |
| Data for <b>13e</b> | S152 |
| Data for <b>13f</b> | S154 |
| Data for <b>13g</b> | S156 |
| Data for <b>13h</b> | S158 |
| Data for <b>12a</b> | S160 |
| Data for <b>12b</b> | S162 |
| Data for <b>12c</b> | S164 |
| Data for <b>12d</b> | S166 |
| Data for <b>12e</b> | S168 |
| Data for <b>12f</b> | S170 |
| Data for <b>12g</b> | S172 |
| Data for <b>12h</b> | S174 |

Data for **10**

S176

Data for **9**

S177

## General Experimental

Infra-red spectra were recorded either neat as thin films between sodium chloride discs, or as a Nujol mull between sodium chloride discs. The intensity of each band is described as s (strong), m (medium) or w (weak) and with the prefix v (very) and suffix br (broad) where appropriate.  $^1\text{H}$ -NMR and  $^{13}\text{C}$ -NMR spectra were recorded in  $\text{CDCl}_3$  unless stated otherwise, at 500 and 125 MHz, 400 and 100 MHz, or 300 and 75 MHz, respectively. Chemical shifts are reported as  $\delta$  values (ppm) referenced to the following solvent signals:  $\text{CHCl}_3$ ,  $\delta_{\text{H}}$  7.26;  $\text{CDCl}_3$ ,  $\delta_{\text{C}}$  77.0. The term, 'stack' is used to describe a region where resonances arising from non-equivalent nuclei are coincident, and multiplet, m, to describe a region where resonances arising from a single nucleus (or equivalent nuclei) are coincident but coupling constants cannot be readily assigned. In analyzing AB systems, where the resonance pattern forms two well-separated groups, each of two lines, these are separately reported as "A of AB" and "B of AB", along with  $J_{\text{A-B}}$ . In analyzing ABX (and similar systems), where the resonance pattern forms two, clearly separated groups of lines (two sets of four lines for an ABX system), these are reported as "A of ABX" and "B of ABX", along with  $J_{\text{A-B}}$ , which can be directly measured from the spectra. Whilst  $J_{\text{A-X}}$  cannot strictly be measured directly from the spectrum, the value obtained from the spectrum is sufficiently close to the actual value for it still to be useful; however it is acknowledged that the value quoted for  $J_{\text{A-X}}$  is not the true value. Connectivities were deduced from COSY90, HSQC and HMBC experiments. GOESY experiments were used to elucidate relative stereochemistry. Mass spectra were recorded on a LCT spectrometer utilizing electrospray ionization (and a methanol mobile phase), or electron impact ionization, and are reported as ( $m/z$  (%)). HRMS were recorded on

a LCT spectrometer using a lock mass incorporated into the mobile phase. Melting points were determined using open capillaries and are uncorrected.

Reactions were monitored by thin layer chromatography using pre-coated glass-backed silica plates (60A F<sub>254</sub>) and visualized by UV detection (at 254 nm) and with ammonium molybdate(IV) - cerium(IV) sulfate staining dip or potassium manganate(VII) staining dip or 2,4-dinitrophenylhydrazine staining dip (for aldehydes). Column chromatography was performed on silica gel (particle size 40-63  $\mu\text{m}$  mesh).

All reactions were conducted in oven-dried (140 °C) or flame-dried glassware under a nitrogen atmosphere, and at ambient temperature (20 to 25 °C) unless otherwise stated, with magnetic stirring. Volumes of 1 mL or less were measured and dispensed with gastight syringes. Evaporation and concentration under reduced pressure was performed at 50 - 500 mbar. Residual solvent was removed under high vacuum (1 mbar).

All reagents were obtained from commercial sources and used without further purification unless stated otherwise. Trimethylsilyl trifluoromethanesulfonate (triflate) was stored in a Schlenk tube under nitrogen at 4 °C and used whilst ever the compound was colorless. Over time, a pink coloration was observed whereupon fresh TMSOTf was used. Dichloromethane and cyclohexane were freshly distilled under nitrogen from CaH<sub>2</sub>. Diethyl ether was freshly distilled under nitrogen from sodium benzophenone ketyl. Toluene was freshly distilled from sodium. All solutions are aqueous and saturated unless stated otherwise. TMSCl was distilled under nitrogen from CaH<sub>2</sub>. 2,4,6-Tri-*tert*-butylpyrimidine (TTBP) was synthesized

following a known procedure.<sup>1</sup> Dess Martin Periodinane was synthesized according to a known procedure.<sup>2</sup>

## References

1. Crich, D.; Smith, M.; Yao, Q.; Picione, J. *Synthesis*, **2001**, 323-326.
2. (a) Ireland, R. E.; Liu, L. *J. Org. Chem.* **1993**, *58*, 2899; (b) Dess, D. B.; Martin, J. C. *J. Am. Chem. Soc.* **1991**, *113*, 7277.

## Propargyltrimethylsilane

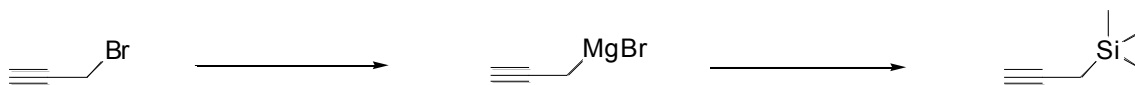

A 1 L round-bottom, triple-necked flask fitted with a condenser and a dropping funnel was charged with magnesium turnings (10.6 g, 440 mmol). Et<sub>2</sub>O (80 mL) was then added and the mixture stirred vigorously. HgCl<sub>2</sub> (1.493 g, 5 mmol) was added in one portion whereupon the reaction mixture turned cloudy. After the solution had assumed a dark grey appearance (usually 10-15 min), the metal was considered activated and a solution of propargyl bromide [1 mL of a solution prepared from propargyl bromide 40 mL, 220 mmol, 80% solution in toluene) and Et<sub>2</sub>O (220 mL)] was added quickly to initiate the reaction (1 min). The remaining propargyl bromide solution was then added dropwise at such a rate (2-4 drops per second) so as to maintain a gentle reflux of the ether solvent. Efficient stirring was maintained for a further 30 min before leaving the reaction to settle (1 h). Transfer and filtration of the ethereal solution *via* a cannula fitted with an oven-dried Whatman 1 filter paper afforded a solution of propargylmagnesium bromide in Et<sub>2</sub>O which was titrated using the method described below (typically 85-100%). The resulting solution was cooled to 0 °C and stirred vigorously. TMSCl (23.8 mL, 1.86 mmol) was then added dropwise over 15 min and the resulting mixture was stirred for a further 45 min at 0 °C and then 1 h at rt. The ethereal solution was transferred to a dry, round-bottom flask and filtered *via* cannula fitted with an oven-dried Whatman 1 filter paper and then left at 4 °C overnight. The less dense, colourless solution was then removed *via* cannula from the more dense, orange-coloured liquid (comprising principally propargyl bromide) and the Et<sub>2</sub>O then removed by distillation (atmospheric pressure,

20 cm Vigreux column). The resulting liquid was further purified by reduced pressure distillation (140 mmHg) to afford propargyltrimethylsilane as a colourless liquid (18.0 g of a 59.0 : 30.8 : 6.2 : 4.1 mixture of  $\text{HC}\equiv\text{CCH}_2\text{SiMe}_3$  : PhMe :  $\text{CH}_2=\text{C}=\text{CHSiMe}_3$  :  $\text{Et}_2\text{O}$ ; 95 mmol, 43% from propargyl bromide). b.p. 34-36 °C (140 mmHg).

### Titration of Propargyl Grignard

Anhydrous 1,10-phenanthroline (a spatula tip) was added to the propargyl Grignard solution prepared above (2.5 mL). The resulting dark pink solution was then diluted with  $\text{Et}_2\text{O}$  (2.5 mL).  $i\text{PrOH}$  (distilled from  $\text{Mg/I}_2$ ) was then added dropwise and the quantity of alcohol required to turn the solution yellow was equivalent to the quantity of organomagnesium compound.

### Trimethylsilylbut-2-yn-1-ol (9)

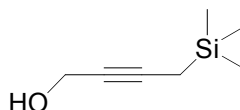

$n\text{-BuLi}$  (27.04 mL of a 2.5 M solution in hexane, 67.6 mmol) was added over 20 min to a solution of propargyltrimethylsilane (7.57 g, 67.6 mmol) in  $\text{Et}_2\text{O}$  (300 mL) at -78 °C. The temperature was raised to 0 °C and the reaction mixture stirred for 1 h. Paraformaldehyde (5.68 g, 135.2 mmol) was added in one portion and the reaction mixture warmed to room temperature. After 48 h, the reaction was quenched by the addition of  $\text{NH}_4\text{Cl}$  solution (200 mL). The phases were separated and the aqueous phase was washed with  $\text{Et}_2\text{O}$  (2 x 200 mL). The combined organic extracts were

washed with brine (200 mL), dried ( $\text{MgSO}_4$ ) and concentrated under reduced pressure. Flash column chromatography of the residue (15% EtOAc in hexane) afforded propargyl alcohol **9** as a colourless oil (8.56 g, 89%);  $R_f = 0.22$  (15 % EtOAc in hexane);  $\nu_{\text{max}}(\text{film})/\text{cm}^{-1}$  3362s br (OH), 2957s, 2898s, 2333w, 2297w, 2217m ( $\text{C}\equiv\text{C}$ ), 1947w, 1949w, 1709w, 1658w, 1640w, 1639w, 1548w, 1512w, 1414m, 1397m, 1360m, 1298m, 1250s, 1169m, 1126s, 1011s, 846s, 786m, 760m, 699s, 666m;  $\delta_{\text{H}}$  (300 MHz) 0.09 (9H, s,  $\text{Si}(\text{CH}_3)_3$ ), 1.49 (2H, t,  $J$  2.6,  $\text{CH}_2\text{Si}(\text{CH}_3)_3$ ), 4.24 (2H, t,  $J$  2.6,  $\text{HOCH}_2\text{C}\equiv\text{C}$ );  $\delta_{\text{C}}$  (75 MHz) -2.3 ( $\text{CH}_3$ ,  $\text{Si}(\text{CH}_3)_3$ ), 6.8 ( $\text{CH}_2$ ,  $\text{CH}_2\text{Si}(\text{CH}_3)_3$ ), 50.9 ( $\text{CH}_2$ ,  $\text{HOCH}_2\text{C}\equiv\text{C}$ ), 77.1 (quat. C,  $\text{C}\equiv\text{C}$ ), 83.6 (quat. C,  $\text{C}\equiv\text{C}$ );  $m/z$  (EI) 142 ( $[\text{M}]^+$ , 10%), 90 (100,  $[\text{Si}(\text{CH}_3)_3\text{OH}]^+$ ), 73 (6,  $[\text{Si}(\text{CH}_3)_3]^+$ ).

Data were in agreement with those reported in the literature.<sup>1</sup>

#### 4-trimethylsilanyl-but-2-ynyl-2',2',2'-trichloroacetimidate (**10**)

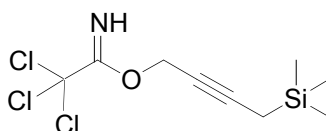

Sodium (15 mg, 0.702 mmol) was added to a cooled (0 °C) solution of propargyl alcohol **9** (0.50 g, 3.51 mmol) in trichloroacetonitrile (1.013 g, 7.02 mmol). The reaction mixture was warmed to room temperature and then stirred for 3 h. The liquid was decanted from the residual solid sodium and the residue was washed with  $\text{Et}_2\text{O}$  (20 mL). The combined organic phases were washed with water (2 x 20 mL) and brine (20 mL), dried ( $\text{MgSO}_4$ ) and concentrated under reduced pressure to afford acetimidate **10** as a colourless liquid, which was used in the next step without

<sup>1</sup> McGarvey, G. J.; Bajwa, J. S. *J. Org. Chem.* **1984**, *49*, 4092.

further purification (1.01 g, quantitative yield); selected data:  $\delta_{\text{H}}$  (300 MHz) 0.09 (9H, s,  $\text{Si}(\text{CH}_3)_3$ ), 1.52 (2H, t,  $J$  2.5,  $\text{CH}_2\text{Si}(\text{CH}_3)_3$ ), 4.90 (2H, t,  $J$  2.5,  $\text{HOCH}_2\text{C}\equiv\text{C}$ ), 8.39 (1H, s, NH).

### General procedure for etherification: formation of **12**

TMSOTf (1 equiv.) was added to a solution of trichloroacetimidate **10** (1 equiv),  $\beta$ -hydroxy ester **11** (1.5 equiv) and TTBP (1.1 equiv) in cyclohexane (0.1 M reaction concentration) at 0 °C. The reaction mixture was warmed to room temperature and then stirred for 5-6 h (consumption of the starting material was monitored by TLC). The reaction was quenched by the addition of  $\text{NaHCO}_3$  solution (1 x volume of organic phase). The two phases were separated and the aqueous phase was extracted with  $\text{Et}_2\text{O}$  (2 x volumes of aqueous phase). The combined organic extracts were washed with water (1/6 x volume of organic phase) and brine (1/6 x volume of organic phase), dried ( $\text{MgSO}_4$ ), filtered and concentrated under reduced pressure. The residue was purified by flash column chromatography.

### Ethyl 3-phenyl-3-(4'-trimethylsilanyl-but-2'-ynyloxy)propionate (**12a**)

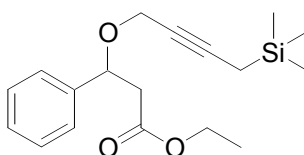

Ether **12a** was prepared from trichloroacetimidate **10** (0.636 g, 2.22 mmol) and  $\beta$ -hydroxy ester **11a** (0.646 g, 3.33 mmol) according to the general procedure. After 5 h, work-up and purification by flash column chromatography (10%  $\text{Et}_2\text{O}$  in hexane) afforded ether **12a** as a colourless oil (0.502 g, 71%);  $R_f$  = 0.23 (10%  $\text{Et}_2\text{O}$  in

hexane); (Found: C, 67.60; H, 8.00.  $C_{18}H_{26}O_3Si$  requires C, 67.88; H, 8.23%);  $\nu_{\max}(\text{film})/\text{cm}^{-1}$  3454w, 3064w, 3032w, 2957s, 2902m, 2857m, 2335w, 2250w, 2215m ( $C\equiv C$ ), 1960w, 1738vs ( $C=O$ ), 1679w, 1641w, 1603w, 1565w, 1546w, 1529w, 1513w, 1494m, 1478m, 1393m, 1372m, 1348m, 1309m, 1250s, 1197m, 1170s, 1127m, 1078s, 1060s, 1030s, 912s, 852vs, 789w, 761m, 734s, 701s, 666m, 648m;  $\delta_H$  (300 MHz) 0.10 (9H, s,  $Si(CH_3)_3$ ), 1.20 (3H, t,  $J$  7.2,  $CO_2CH_2CH_3$ ), 1.49 (2H, t,  $J$  2.4,  $CH_2Si(CH_3)_3$ ), 2.62 (1H, A of ABX,  $J_{A-B}$  15.1,  $J_{A-X}$  5.9,  $CH_aH_bC=O$ ), 2.86 (1H, B of ABX,  $J_{B-A}$  15.1,  $J_{B-X}$  8.1,  $CH_aH_bC=O$ ), 3.86 (1H, A of  $ABX_2$ ,  $J_{A-B}$  15.1,  $J_{A-X}$  2.4,  $OCH_aH_bC\equiv C$ ), 4.03-4.15 (3H, stack including [4.08 (1H, B of  $ABX_2$ ,  $J_{B-A}$  15.1,  $J_{B-X}$  2.4,  $OCH_aH_bC\equiv C$ )], [4.10 (2H, q,  $J$  7.2,  $CO_2CH_2CH_3$ )],  $OCH_aH_bC\equiv C$ ,  $CO_2CH_2CH_3$ ), 4.98 (1H, dd,  $J$  8.1, 5.9, 3- $H$ ), 7.26-7.37 (5H, stack, Ph $H$ );  $\delta_C$  (75 MHz) -2.2 ( $CH_3$ ,  $Si(CH_3)_3$ ), 7.0 ( $CH_2$ ,  $C\equiv CCH_2Si$ ), 13.9 ( $CH_3$ ,  $OCH_2CH_3$ ) 43.1 ( $CH_2$ ,  $CH_2C=O$ ), 56.3 ( $CH_2$ ,  $OCH_2C\equiv C$ ), 60.2 ( $CH_2$ ,  $OCH_2CH_3$ ), 74.2 (quat. C,  $C\equiv C$ ), 76.2 (CH, C-3), 84.5 (quat. C,  $C\equiv C$ ), 126.7 (CH, Ph), 127.9 (CH, Ph), 128.3 (CH, Ph), 140.0 (quat. C, *ipso*Ph), 170.3 (quat. C,  $C=O$ );  $m/z$  (TOF ES+) 341.1 ( $[M+Na]^+$ , 100%); HRMS  $m/z$  (TOF ES+) 341.1562.  $C_{18}H_{26}NaO_3Si$  requires 341.1549.

### Ether **12b** (3-(4'-trimethylsilanyl-but-2'-ynyl-oxy)heptanoate (**12b**))

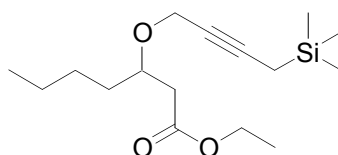

Ether **12b** was prepared from trichloroacetimidate **10** (0.730 g, 2.55 mmol) and  $\beta$ -hydroxy ester **11b** (0.667 g, 3.83 mmol) according to the general procedure. After 5 h, work-up and purification by flash column chromatography (10%  $Et_2O$  in hexane) afforded ether **12b** as a colourless oil (0.563 g, 74%);  $R_f$  = 0.22 (10%  $Et_2O$  in

hexane); (Found: C, 64.54; H, 10.10. C<sub>16</sub>H<sub>30</sub>O<sub>3</sub>Si requires C, 64.38; H, 10.13%);  $\nu_{\max}(\text{film})/\text{cm}^{-1}$  3445w, 2956s, 2860m, 2212m (C≡C), 1957w, 1735s (C=O), 1652w, 1558w, 1540w, 1506w, 1457m, 1374m, 1350m, 1301m, 1250s, 1213m, 1175m, 1125m, 1064m, 1036m, 851s, 790w, 760w, 699w, 666w;  $\delta_{\text{H}}$  (300 MHz); 0.09 (9H, s, Si(CH<sub>3</sub>)<sub>3</sub>), 0.89 (3H, t, *J* 6.6, CH<sub>3</sub>(CH<sub>2</sub>)<sub>3</sub>), 1.22-1.35 (7H, stack including [1.25 (3H, t, *J* 7.0, CO<sub>2</sub>CH<sub>2</sub>CH<sub>3</sub>], 2 x CH<sub>2</sub>, CO<sub>2</sub>CH<sub>2</sub>CH<sub>3</sub>), 1.47-1.58 (4H, stack including [1.49 (2H, t, *J* 2.2, CH<sub>2</sub>Si(CH<sub>3</sub>)<sub>3</sub>], 1 x CH<sub>2</sub>, CH<sub>2</sub>Si(CH<sub>3</sub>)<sub>3</sub>), 2.41 (1H, A of ABX, *J*<sub>A-B</sub> 15.2, *J*<sub>A-X</sub> 6.2, CH<sub>a</sub>H<sub>b</sub>C=O), 2.57 (1H, B of ABX, *J*<sub>B-A</sub> 15.2, *J*<sub>B-X</sub> 6.2, CH<sub>a</sub>H<sub>b</sub>C=O), 3.91 (1H, app. quintet, *J* 6.2, 3-*H*), 4.01-4.26 (4H, stack including [4.13 (2H, q, *J* 6.6, CO<sub>2</sub>CH<sub>2</sub>CH<sub>3</sub>], OCH<sub>2</sub>C≡C, CO<sub>2</sub>CH<sub>2</sub>CH<sub>3</sub>));  $\delta_{\text{C}}$  (75 MHz) -2.2 (CH<sub>3</sub>, Si(CH<sub>3</sub>)<sub>3</sub>), 7.1 (CH<sub>2</sub>, C≡CCH<sub>2</sub>Si), 13.9 (CH<sub>3</sub>), 14.1 (CH<sub>3</sub>), 22.6 (CH<sub>2</sub>), 27.2 (CH<sub>2</sub>), 33.9 (CH<sub>2</sub>), 39.5 (CH<sub>2</sub>, CH<sub>2</sub>C=O), 57.2 (OCH<sub>2</sub>C≡C), 60.2 (CH<sub>2</sub>, OCH<sub>2</sub>CH<sub>3</sub>), 74.80 (CH, C-3), 74.83 (quat. C, C≡C), 84.1 (quat. C, C=C), 171.4 (quat. C, C=O); *m/z* (TOF ES+) 321.1 ([M+Na]<sup>+</sup>, 100%); HRMS *m/z* (TOF ES+) 321.1859. C<sub>16</sub>H<sub>30</sub>NaO<sub>3</sub>Si requires 321.1862.

### Ethyl 5-methyl-3-(4'-trimethylsilanyl-but-2'-ynyloxy)hexanoate (**12c**)

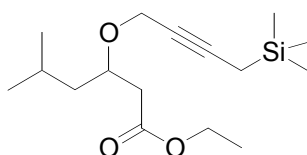

Ether **12c** was prepared from trichloroacetimidate **10** (0.650 g, 2.27 mmol) and  $\beta$ -hydroxy ester **11c** (0.590 g, 3.40 mmol) according to the general procedure. After 5 h, work-up and purification by flash column chromatography (10% Et<sub>2</sub>O in hexane) afforded ether **12c** as a colourless oil (0.393 g, 58%); *R<sub>f</sub>* = 0.28 (10% Et<sub>2</sub>O in hexane);  $\nu_{\max}(\text{film})/\text{cm}^{-1}$  3454w, 2958s, 2939s, 2873m, 2220w (C≡C), 1735s (C=O), 1467w, 1375m, 1251s, 1179s, 1127m, 1067m, 1034m, 853m, 665m;  $\delta_{\text{H}}$  (300 MHz)

0.09 (9H, s, Si(CH<sub>3</sub>)<sub>3</sub>), 0.88-0.93 (6H, stack, (CH<sub>3</sub>)<sub>2</sub>CH), 1.19-1.37 (4H, stack including [1.25 (3H, t, *J* 7.2, CO<sub>2</sub>CH<sub>2</sub>CH<sub>3</sub>)], <sup>i</sup>PrCH<sub>a</sub>H<sub>b</sub>, CO<sub>2</sub>CH<sub>2</sub>CH<sub>3</sub>), 1.41-1.55 (3H, stack including [1.49 (2H, t, *J* 2.4, CH<sub>2</sub>Si(CH<sub>3</sub>)<sub>3</sub>)], <sup>i</sup>PrCH<sub>a</sub>H<sub>b</sub>, CH<sub>2</sub>Si(CH<sub>3</sub>)<sub>3</sub>), 1.68-1.83 (1H, m, (CH<sub>3</sub>)<sub>2</sub>CH), 2.39 (1H, A of ABX, *J*<sub>A-B</sub> 15.0, *J*<sub>A-X</sub> 6.4, CH<sub>a</sub>H<sub>b</sub>C=O), 2.59 (1H, B of ABX, *J*<sub>B-A</sub> 15.0, *J*<sub>B-X</sub> 5.9, CH<sub>a</sub>H<sub>b</sub>C=O), 3.89-4.03 (1H, m, 3-*H*), 4.08-5.01 (4H, stack, CO<sub>2</sub>CH<sub>2</sub>CH<sub>3</sub>, OCH<sub>2</sub>C≡C); δ<sub>C</sub> (75 MHz) -2.1 (CH<sub>3</sub>, Si(CH<sub>3</sub>)<sub>3</sub>), 7.1 (CH<sub>2</sub>, C≡CCH<sub>2</sub>Si), 14.1 (CH<sub>3</sub>, OCH<sub>2</sub>CH<sub>3</sub>), [22.3, 23.1, 24.4 (2 x CH<sub>3</sub>, 1 x CH, (CH<sub>3</sub>)<sub>2</sub>CH)], 39.8 (CH<sub>2</sub>, CH<sub>2</sub>C=O), 44.0 (CH<sub>2</sub>, <sup>i</sup>PrCH<sub>2</sub>), 57.2 (CH<sub>2</sub>, OCH<sub>2</sub>C≡C), 60.2 (CH<sub>2</sub>, OCH<sub>2</sub>CH<sub>3</sub>), 73.3 (CH, C-3), 74.8 (quat. C, C≡C), 84.2 (quat. C, C≡C), 171.4 (quat. C, C=O); *m/z* (TOF ES+) 321.2 ([M+Na]<sup>+</sup>, 100%); HRMS *m/z* (TOF ES+) 321.1874. C<sub>16</sub>H<sub>30</sub>NaO<sub>3</sub>Si requires 321.1862.

### Ethyl 3-(4'-trimethylsilanyl-but-2'-ynyloxy)butyrate (**12d**)

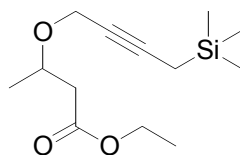

Ether **12d** was prepared from trichloroacetimidate **10** (0.774 g, 2.70 mmol) and β-hydroxy ester **11d** (0.535 g, 4.05 mmol) according to the general procedure. After 5 h, work-up and purification by flash column chromatography (10% Et<sub>2</sub>O in hexane) afforded ether **12d** as a colourless oil (0.512 g, 74%); *R<sub>f</sub>* = 0.19 (10% Et<sub>2</sub>O in hexane); ν<sub>max</sub>(film)/cm<sup>-1</sup> 3583w, 2959m, 2901m, 2360w, 2214m (C≡C), 1738s (C=O), 1448m, 1376m, 1303m, 1250s, 1186s, 1134m, 1082s, 1041s, 852s, 790w, 761w, 699m, 666m; δ<sub>H</sub> (300 MHz) 0.09 (9H, s, Si(CH<sub>3</sub>)<sub>3</sub>), 1.19-1.29 (6H, stack including [1.22 (3H, d, *J* 5.9, CH<sub>3</sub>)], [1.25 (3H, t, *J* 7.2, CO<sub>2</sub>CH<sub>2</sub>CH<sub>3</sub>)], CH<sub>3</sub>, CO<sub>2</sub>CH<sub>2</sub>CH<sub>3</sub>), 1.49 (2H, t, *J* 2.6, CH<sub>2</sub>Si(CH<sub>3</sub>)<sub>3</sub>), 2.36 (1H, dd, *J* 15.0, 6.6,

$\text{CH}_a\text{H}_b\text{C}=\text{O}$ ), 2.62 (1H, dd,  $J$  15.0, 6.6,  $\text{CH}_a\text{H}_b\text{C}=\text{O}$ ), 4.01-4.18 (5H, stack,  $\text{CO}_2\text{CH}_2\text{CH}_3$ ,  $\text{OCH}_2\text{C}\equiv\text{C}$ , 3- $H$ );  $\delta_{\text{C}}$  (75 MHz) -2.2 ( $\text{CH}_3$ ,  $\text{Si}(\text{CH}_3)_3$ ), 7.0 ( $\text{CH}_2$ ,  $\text{C}\equiv\text{CCH}_2\text{Si}$ ), 14.0 ( $\text{CH}_3$ ,  $\text{OCH}_2\text{CH}_3$ ), 19.6 ( $\text{CH}_3$ , C-4), 41.6 ( $\text{CH}_2$ ,  $\text{CH}_2\text{C}=\text{O}$ ), 56.5 ( $\text{CH}_2$ ,  $\text{OCH}_2\text{C}\equiv\text{C}$ ), 60.1 ( $\text{CH}_2$ ,  $\text{OCH}_2\text{CH}_3$ ), 70.5 ( $\text{CH}$ , C-3), 74.6 (quat. C,  $\text{C}\equiv\text{C}$ ), 84.2 (quat. C,  $\text{C}\equiv\text{C}$ ), 171.0 (quat. C,  $\text{C}=\text{O}$ );  $m/z$  (TOF ES+) 279.9 ( $[\text{M}+\text{Na}]^+$ , 100%); HRMS  $m/z$  (TOF ES+) 279.1399.  $\text{C}_{13}\text{H}_{24}\text{NaO}_3\text{Si}$  requires 279.1392.

### Ethyl 5-benzyloxy-3-(4'-trimethylsilanyl-but-2'-ynyloxy)pentanoate (**12e**)

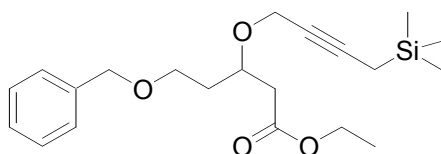

Ether **12e** was prepared from trichloroacetimidate **10** (0.601g, 2.10 mmol) and  $\beta$ -hydroxy ester **11e** (0.795 g, 3.15 mmol) according to the general procedure. After 6 h, work-up and purification by flash column chromatography (10%  $\text{Et}_2\text{O}$  in hexane) afforded ether **12e** as a colourless oil (0.530 g, 67%);  $R_f$  = 0.21 (10%  $\text{Et}_2\text{O}$  in hexane);  $\nu_{\text{max}}(\text{film})/\text{cm}^{-1}$  3582w, 3064w, 3030m, 2213m ( $\text{C}\equiv\text{C}$ ), 1958w, 1735s ( $\text{C}=\text{O}$ ), 1496w, 1454m, 1367m, 1306m, 1249s, 1214m, 1174s, 1096s, 852s, 791w, 737m, 699m, 666m;  $\delta_{\text{H}}$  (300 MHz) 0.08 (9H, s,  $\text{Si}(\text{CH}_3)_3$ ), 1.24 (3H, t,  $J$  7.0,  $\text{CO}_2\text{CH}_2\text{CH}_3$ ), 1.47 (2H, t,  $J$  2.6,  $\text{CH}_2\text{Si}(\text{CH}_3)_3$ ), 1.88 (2H, app. q,  $J$  6.2,  $\text{BnOCH}_2\text{CH}_2$ ), 2.48 (1H, A of ABX,  $J_{\text{A-B}}$  15.2,  $J_{\text{A-X}}$  6.1,  $\text{CH}_a\text{H}_b\text{C}=\text{O}$ ), 2.61 (1H, B of ABX,  $J_{\text{B-A}}$  15.2,  $J_{\text{B-X}}$  6.6,  $\text{CH}_a\text{H}_b\text{C}=\text{O}$ ), 3.56-3.61 (2H, m,  $\text{BnOCH}_2$ ), 3.98-4.21 (5H, stack including [4.12 (2H, q,  $J$  7.0,  $\text{CO}_2\text{CH}_2\text{CH}_3$ ],  $\text{OCH}_2\text{C}\equiv\text{C}$ , 3- $H$ ,  $\text{CO}_2\text{CH}_2\text{CH}_3$ ), 4.49 (2H, s,  $\text{PhCH}_2$ ), 7.26-7.37 (5H, stack,  $\text{PhH}$ );  $\delta_{\text{C}}$  (75 MHz) -2.3 ( $\text{CH}_3$ ,  $\text{Si}(\text{CH}_3)_3$ ), 6.9 ( $\text{CH}_2$ ,  $\text{C}\equiv\text{CCH}_2\text{Si}$ ), 14.0 ( $\text{CH}_3$ ,  $\text{OCH}_2\text{CH}_3$ ), 34.3 ( $\text{CH}_2$ ,  $\text{BnOCH}_2\text{CH}_2$ ), 39.6 ( $\text{CH}_2$ ,  $\text{CH}_2\text{C}=\text{O}$ ), 57.5 ( $\text{CH}_2$ ,  $\text{OCH}_2\text{C}\equiv\text{C}$ ), 60.1 ( $\text{CH}_2$ ,  $\text{OCH}_2\text{CH}_3$ ), 66.4 ( $\text{CH}_2$ ,  $\text{BnOCH}_2$ ), 72.3 ( $\text{CH}$ , C-3), 72.6 ( $\text{CH}_2$ ,  $\text{PhCH}_2\text{O}$ ),

74.6 (quat. C, C $\equiv$ C), 84.2 (quat. C, C $\equiv$ C), [127.3, 128.1, (3 x CH, Ph, overlapping resonance)], 138.2 (quat. C, *ipso*Ph), 171.0 (quat. C, C=O); *m/z* (TOF ES+) 399.3 ([M+Na]<sup>+</sup>, 100%); HRMS *m/z* (TOF ES+) 399.1971. C<sub>21</sub>H<sub>32</sub>NaO<sub>4</sub>Si requires 399.1968.

**Ethyl 4-(*tert*-butyl-diphenyl-silanyloxy)-3-(4'-trimethylsilanyl-but-2'-ynyloxy)butyrate (12f)**

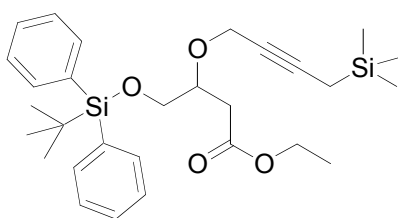

Ether **12f** was prepared from trichloroacetimidate **10** (0.350 g, 1.22 mmol) and  $\beta$ -hydroxy ester **11f** (0.748 g, 1.83 mmol) according to the general procedure. After 5 h, work-up and purification by flash column chromatography (10% Et<sub>2</sub>O in hexane) afforded ether **12f** as a colourless oil (0.380 g, 61%); *R<sub>f</sub>* = 0.22 (10% Et<sub>2</sub>O in hexane);  $\nu_{\text{max}}$ (film)/cm<sup>-1</sup> 3583w, 3354w, 2979m, 2360w, 2226 (C $\equiv$ C), 1735s (C=O), 1448w, 1378m, 1305m, 1251s, 1190s, 1134m, 1075m, 954w, 852s, 700w, 666m;  $\delta_{\text{H}}$  (300 MHz) 0.04 (9H, s, Si(CH<sub>3</sub>)<sub>3</sub>), 1.02 (9H, s, C(CH<sub>3</sub>)<sub>3</sub>), 1.22 (3H, t, *J* 7.2, CO<sub>2</sub>CH<sub>2</sub>CH<sub>3</sub>), 1.42 (2H, t, *J* 2.4, CH<sub>2</sub>Si(CH<sub>3</sub>)<sub>3</sub>), 2.52 (1H, A of ABX, *J*<sub>A-B</sub> 15.7, *J*<sub>A-X</sub> 7.53, CH<sub>a</sub>H<sub>b</sub>C=O), 2.66 (1H, B of ABX, *J*<sub>B-A</sub> 15.7, *J*<sub>B-X</sub> 5.1, CH<sub>a</sub>H<sub>b</sub>C=O), 3.60 (1H, A of ABX, *J*<sub>A-B</sub> 10.7, *J*<sub>A-X</sub> 5.5, SiOCH<sub>a</sub>H<sub>b</sub>), 3.75 (1H, B of ABX, *J*<sub>B-A</sub> 10.7, *J*<sub>B-X</sub> 5.1, SiOCH<sub>a</sub>H<sub>b</sub>), 3.99-4.21 (5H, stack including [4.10 (2H, q, 7.2, CO<sub>2</sub>CH<sub>2</sub>CH<sub>3</sub>)], OCH<sub>2</sub>C $\equiv$ C, 3-*H*, CO<sub>2</sub>CH<sub>2</sub>CH<sub>3</sub>), 7.31-7.45 (6H, stack, Ph*H*), 7.61-7.67 (4H, stack, Ph*H*);  $\delta_{\text{C}}$  (75 MHz) -2.1 (CH<sub>3</sub>, Si(CH<sub>3</sub>)<sub>3</sub>), 7.1 (CH<sub>2</sub>, C $\equiv$ CCH<sub>2</sub>Si), 14.2 (CH<sub>3</sub>, OCH<sub>2</sub>CH<sub>3</sub>), 19.2 (quat. C, C(CH<sub>3</sub>)<sub>3</sub>), 26.8 (CH<sub>3</sub>, C(CH<sub>3</sub>)<sub>3</sub>), 37.4 (CH<sub>2</sub>, CH<sub>2</sub>C=O), 58.4

(CH<sub>2</sub>, OCH<sub>2</sub>C≡C), 60.3 (CH<sub>2</sub>, OCH<sub>2</sub>CH<sub>3</sub>), 65.0 (CH<sub>2</sub>, SiOCH<sub>2</sub>), 74.8 (quat. C, C≡C), 75.4 (CH, C-3), 84.5 (quat. C, C≡C), 127.6 (CH, *m*-Ph), 129.6 (CH, *p*-Ph), [133.25, 133.32, (quat. C, *ipso*Ph)], [135.5, 135.6 (CH, *o*-Ph)], 171.4 (quat. C, C=O); *m/z* (TOF ES+) 533.1 ([M+Na]<sup>+</sup>, 100%); HRMS *m/z* (TOF ES+) 533.2501. C<sub>29</sub>H<sub>42</sub>NaO<sub>4</sub>Si<sub>2</sub> requires 533.2519.

### Ethyl 3-(furan-2'-yl)-3-(4''-trimethylsilanyl-but-2''-ynyloxy)propionate (**12g**)

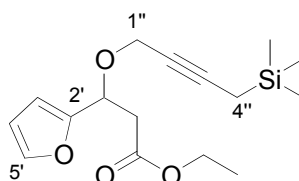

Ether **12g** was prepared from trichloroacetimidate **10** (0.700 g, 2.09 mmol) and β-hydroxy ester **11g** (0.574 g, 3.14 mmol) according to the general procedure. After 5 h, work-up and purification by flash column chromatography (10% Et<sub>2</sub>O in hexane) afforded ether **12g** as a colourless oil (0.348 g, 54%); *R<sub>f</sub>* = 0.18 (10% Et<sub>2</sub>O in hexane); *v*<sub>max</sub>(film)/cm<sup>-1</sup> 3583w, 3374w, 2957m, 2901m, 2214w (C≡C), 1739s (C=O), 1585w, 1503w, 1446w, 1372m, 1335w, 1290m, 1250s, 1210w, 1166m, 1127w, 1057m, 1014m, 926w, 852s, 789w, 742w, 699w, 655w; δ<sub>H</sub> (300 MHz) 0.11 (9H, s, Si(CH<sub>3</sub>)<sub>3</sub>), 1.22 (3H, t, *J* 7.2, CO<sub>2</sub>CH<sub>2</sub>CH<sub>3</sub>), 1.51 (2H, t, *J* 2.2, CH<sub>2</sub>Si(CH<sub>3</sub>)<sub>3</sub>), 2.81 (1H, A of ABX, *J*<sub>A-B</sub> 15.4, *J*<sub>A-X</sub> 6.6, CH<sub>a</sub>H<sub>b</sub>C=O), 2.97 (1H, B of ABX, *J*<sub>B-A</sub> 15.4, *J*<sub>B-X</sub> 7.7, CH<sub>a</sub>H<sub>b</sub>C=O), 3.94 (1H, A of ABX<sub>2</sub>, *J*<sub>A-B</sub> 15.1, *J*<sub>A-X</sub> 2.4, OCH<sub>a</sub>H<sub>b</sub>C≡C), 4.07-4.19 (3H, stack, CO<sub>2</sub>CH<sub>2</sub>CH<sub>3</sub>, OCH<sub>a</sub>H<sub>b</sub>C≡C), 5.04 (1H, app. t, *J* 7.0, 3-*H*), 6.30-6.37 (2H, stack, furyl CCHCH), 7.39 (1H, s with unresolved fine coupling, furyl OCH); δ<sub>C</sub> (75 MHz) -2.1 (CH<sub>3</sub>, Si(CH<sub>3</sub>)<sub>3</sub>), 7.1 (CH<sub>2</sub>, C≡CCH<sub>2</sub>Si), 14.0 (CH<sub>3</sub>, OCH<sub>2</sub>CH<sub>3</sub>), 39.4 (CH<sub>2</sub>, CH<sub>2</sub>C=O), 56.4 (CH<sub>2</sub>, OCH<sub>2</sub>C≡C), 60.4 (CH<sub>2</sub>, OCH<sub>2</sub>CH<sub>3</sub>), 69.0 (CH, C-3), 74.0

(quat. C, C $\equiv$ C), 85.0 (quat. C, C $\equiv$ C), 108.8 (CH, furyl CH), 109.9 (CH, furyl CH), 142.8 (CH, furyl OCH), 152.2 (quat. C, furyl C), 170.1 (quat. C, C=O); *m/z* (TOF ES+) 331.1 ([M+Na]<sup>+</sup>, 100%); HRMS *m/z* (TOF ES+) 331.1339. C<sub>16</sub>H<sub>24</sub>NaO<sub>4</sub>Si requires 331.1342.

**(E) Ethyl 5-phenyl-3-(4'-trimethylsilanyl-but-2'-ynyloxy)pent-4-enoate (12h)**

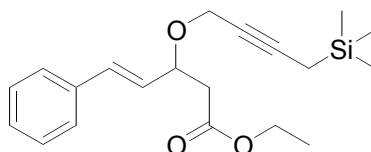

Ether **12h** was prepared from trichloroacetimidate **10** (0.616 g, 2.15 mmol) and  $\beta$ -hydroxy ester **11h** (0.710 g, 3.23 mmol) according to the general procedure. After 6 h, work-up and purification by flash column chromatography (10% Et<sub>2</sub>O in hexane) afforded ether **12h** as a yellow oil (0.474 g, 64%); *R<sub>f</sub>* = 0.26 (10% Et<sub>2</sub>O in hexane);  $\nu_{\text{max}}(\text{film})/\text{cm}^{-1}$  3583w, 3366w, 3027w, 2957m, 2900m, 2360w, 2340w, 2213w (C $\equiv$ C), 1737s (C=O), 1627m (C=C), 1495w, 1449m, 1369m, 1344m, 1302m, 1249s, 1167m, 1133m, 1055s, 969m, 851s, 790w, 751m, 694m, 666m;  $\delta_{\text{H}}$  (300 MHz) 0.11 (9H, s, Si(CH<sub>3</sub>)<sub>3</sub>), 1.23 (3H, t, *J* 7.3, CO<sub>2</sub>CH<sub>2</sub>CH<sub>3</sub>), 1.51 (2H, t, *J* 2.4, CH<sub>2</sub>Si(CH<sub>3</sub>)<sub>3</sub>), 2.56 (1H, A of ABX, *J*<sub>A-B</sub> 15.0, *J*<sub>A-X</sub> 6.4, CH<sub>a</sub>CH<sub>b</sub>C=O), 2.75 (1H, B of ABX, *J*<sub>B-A</sub> 15.0, *J*<sub>B-X</sub> 7.4, CH<sub>a</sub>CH<sub>b</sub>C=O), 3.96-4.25 (4H, stack including [4.13 (2H, q, *J* 7.3, CO<sub>2</sub>CH<sub>2</sub>CH<sub>3</sub>)], OCH<sub>2</sub>C $\equiv$ C, CO<sub>2</sub>CH<sub>2</sub>CH<sub>3</sub>), 4.55 (1H, app. q, *J* 7.4, 3-*H*), 6.05 (1H, dd, *J* 16.1, 8.3, PhCH=CH), 6.64 (1H, d, *J* 16.1, PhCH=CH), 7.21-7.50 (5H, stack, PhH);  $\delta_{\text{C}}$  (75 MHz) -2.2 (CH<sub>3</sub>, Si(CH<sub>3</sub>)<sub>3</sub>), 7.0 (CH<sub>2</sub>, C $\equiv$ CCH<sub>2</sub>Si), 14.0 (CH<sub>3</sub>, OCH<sub>2</sub>CH<sub>3</sub>), 41.0 (CH<sub>2</sub>, CH<sub>2</sub>C=O), 56.1 (CH<sub>2</sub>, OCH<sub>2</sub>C $\equiv$ C), 60.2 (CH<sub>2</sub>, OCH<sub>2</sub>CH<sub>3</sub>), 74.4 (quat. C, C $\equiv$ C), 75.1 (CH, C-3), 84.5 (quat. C, C $\equiv$ C), 126.4 (CH), 127.6 (CH), 127.7 (CH), 128.3 (CH), 133.4 (CH), 136.0 (quat. C, *ipso*Ph), 170.2 (quat. C, C=O); *m/z* (TOF ES+) 367.2

([M+Na]<sup>+</sup>, 100%); HRMS *m/z* (TOF ES<sup>+</sup>) 367.1700. C<sub>20</sub>H<sub>28</sub>NaO<sub>3</sub>Si requires 367.1705.

**(Z) Ethyl 3-phenyl-3-(4'-trimethylsilanyl-but-2'-enyloxy)propionate (13a)**

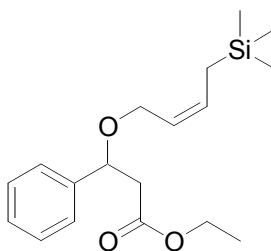

Raney nickel (a spatula tip) was added to a solution of alkyne **12a** (0.400 g, 1.34 mmol) in EtOH (39 mL) at rt. The solution was charged with H<sub>2</sub> gas (3 x vacuum-H<sub>2</sub> flushes) and the resulting solution stirred for 8 min under an atmosphere of H<sub>2</sub>. Filtration and removal of the solvent under reduced pressure left a residue which was purified by flash column chromatography (10% Et<sub>2</sub>O in hexane) to afford alkene **13a** as a colourless oil (0.395 g, 92%); *R<sub>f</sub>* = 0.24 (10% Et<sub>2</sub>O in hexane); *v*<sub>max</sub>(film)/cm<sup>-1</sup> 3583w, 3074w, 3027m, 2956s, 2896m, 1950w, 1739s (C=O), 1643w (C=C), 1603w, 1548w, 1530w, 1512w, 1494w, 1454m, 1415m, 1372m, 1336m, 1309m, 1249s, 1164m, 1094m, 1030m, 912w, 854s, 762m, 733m, 701s, 665m; *δ*<sub>H</sub> (300 MHz) -0.07 (9H, s, Si(CH<sub>3</sub>)<sub>3</sub>), 1.21 (3H, t, *J* 7.1, CO<sub>2</sub>CH<sub>2</sub>CH<sub>3</sub>), 1.37 (2H, d, *J* 8.8, CH<sub>2</sub>Si(CH<sub>3</sub>)<sub>3</sub>), 2.57 (1H, A of ABX, *J*<sub>A-B</sub> 15.3, *J*<sub>A-X</sub> 5.0, CH<sub>a</sub>CH<sub>b</sub>C=O), 2.81 (1H, B of ABX, *J*<sub>B-A</sub> 15.3, *J*<sub>B-X</sub> 9.0, CH<sub>a</sub>CH<sub>b</sub>C=O), 3.84 (2H, d, *J* 6.2, OCH<sub>2</sub>CH=CH), 4.12 (2H, q, *J* 7.1, CO<sub>2</sub>CH<sub>2</sub>CH<sub>3</sub>), 4.78 (1H, dd, *J* 9.0, 5.0, 3-*H*), 5.39-5.69 (1H, m, OCH<sub>2</sub>CH=CH), 5.51-5.68 (1H, m, OCH<sub>2</sub>CH=CH), 7.25-7.41 (5H, stack, PhH); *δ*<sub>C</sub> (75 MHz) -2.0 (CH<sub>3</sub>, Si(CH<sub>3</sub>)<sub>3</sub>), 14.1 (CH<sub>3</sub>, OCH<sub>2</sub>CH<sub>3</sub>), 19.0 (CH<sub>2</sub>, CH=CHCH<sub>2</sub>Si), 43.6 (CH<sub>2</sub>, CH<sub>2</sub>C=O), 60.4 (CH<sub>2</sub>, OCH<sub>2</sub>CH<sub>3</sub>), 64.3 (CH<sub>2</sub>, OCH<sub>2</sub>CH=CH), 77.5 (CH, C-3),

123.4 (CH, CH=CH), 126.6 (CH, Ph), 127.8 (CH, Ph), 128.4 (CH, Ph), 129.8 (CH, CH=CH), 141.1 (quat. C, *ipso*Ph), 170.8 (quat. C, C=O); *m/z* (TOF ES+) 343.3 ([M+Na]<sup>+</sup>, 100%); HRMS *m/z* (TOF ES+) 343.1701. C<sub>18</sub>H<sub>28</sub>NaO<sub>3</sub>Si requires 343.1705.

**(Z) Ethyl 3-(4'-trimethylsilanyl-but-2'-enyloxy)heptanoate (13b)**

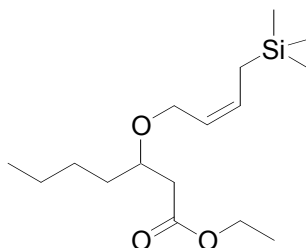

Raney nickel (a spatula tip) was added to a solution of alkyne **12b** (0.325 g, 1.09 mmol) in EtOH (31 mL) at rt. The solution was charged with H<sub>2</sub> gas (3 x vacuum-H<sub>2</sub> flushes) and the resulting solution stirred for 15 min under an atmosphere of H<sub>2</sub>. Filtration and removal of the solvent under reduced pressure left a residue which was purified by flash column chromatography (10% Et<sub>2</sub>O in hexane) to afford alkene **13b** as a colourless oil (311 mg, 95%); *R<sub>f</sub>* = 0.23 (10% Et<sub>2</sub>O in hexane); *v*<sub>max</sub>(film)/cm<sup>-1</sup> 3446w, 2955s, 2872m, 1738s (C=O), 1646m (C=C), 1558w, 1540w, 1506w, 1465m, 1418m, 1374m, 1338m, 1301m, 1248s, 1176m, 1094m, 1036m, 944w, 854s, 773w, 727m, 702m, 665m; *δ*<sub>H</sub> (300 MHz) -0.01 (9H, s, Si(CH<sub>3</sub>)<sub>3</sub>), 0.89 (3H, t, *J* 7.0, CH<sub>3</sub>(CH<sub>2</sub>)<sub>3</sub>), 1.21-1.39 (7H, stack including [1.25 (3H, t, *J* 7.2, CO<sub>2</sub>CH<sub>2</sub>CH<sub>3</sub>), 2 x CH<sub>2</sub>, CO<sub>2</sub>CH<sub>2</sub>CH<sub>3</sub>], 1.34-1.56 (4H, stack including [1.50 (2H, d, *J* 8.8, CH<sub>2</sub>Si(CH<sub>3</sub>)<sub>3</sub>), 1 x CH<sub>2</sub>, CH<sub>2</sub>Si(CH<sub>3</sub>)<sub>3</sub>], 2.40 (1H, A of ABX, *J*<sub>A-B</sub> 15.1, *J*<sub>A-X</sub> 5.5, CH<sub>a</sub>H<sub>b</sub>C=O), 2.55 (1H, B of ABX, *J*<sub>B-A</sub> 15.1, *J*<sub>B-X</sub> 7.0, CH<sub>a</sub>H<sub>b</sub>C=O), 3.75 (1H, app. quintet, *J* 6.1, 3-*H*), 4.00 (2H, d, *J* 6.6, OCH<sub>2</sub>CH=CH), 4.13 (2H, q, *J* 7.2,

CO<sub>2</sub>CH<sub>2</sub>CH<sub>3</sub>), 5.41 (1H, dt, *J* 11.0, 6.6, OCH<sub>2</sub>CH=CH), 5.51-5.69 (1H, m, OCH<sub>2</sub>CH=CH); δ<sub>C</sub> (75 MHz) -2.0 (CH<sub>3</sub>, Si(CH<sub>3</sub>)<sub>3</sub>), 13.9 (CH<sub>3</sub>), 14.1 (CH<sub>3</sub>), 19.1 (CH<sub>2</sub>, CH=CHCH<sub>2</sub>Si), 22.7 (CH<sub>2</sub>), 27.3 (CH<sub>2</sub>), 34.2 (CH<sub>2</sub>), 40.0 (CH<sub>2</sub>, CH<sub>2</sub>C=O), 60.2 (CH<sub>2</sub>, OCH<sub>2</sub>CH<sub>3</sub>), 64.9 (OCH<sub>2</sub>CH=CH), 75.6 (CH, C-3), 123.9 (CH, CH=CH), 129.2 (CH, CH=CH), 171.8 (quat. C, C=O); *m/z* (TOF ES+) 323.2 ([M+Na]<sup>+</sup>, 100%); HRMS *m/z* (TOF ES+) 323.2007. C<sub>16</sub>H<sub>32</sub>NaO<sub>3</sub>Si requires 323.2018.

**(Z) Ethyl 5-methyl-3-(4'-trimethylsilanyl-but-2'-enyloxy)hexanoate (13c)**

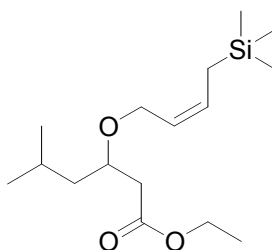

Raney nickel (a spatula tip) was added to a solution of alkyne **12c** (0.300 g, 1.01 mmol) in EtOH (30 mL) at rt. The solution was charged with H<sub>2</sub> gas (3 x vacuum-H<sub>2</sub> flushes) and the resulting solution stirred for 12 min under an atmosphere of H<sub>2</sub>. Filtration and removal of the solvent under reduced pressure left a residue which was purified by flash column chromatography (10% Et<sub>2</sub>O in hexane) to afford alkene **13c** as a colourless oil (0.276 g, 91%); *R<sub>f</sub>* = 0.26 (10% Et<sub>2</sub>O in hexane); ν<sub>max</sub>(film)/cm<sup>-1</sup> 3583w, 3384w, 2956s, 2871m, 2360w, 2842w, 1737s (C=O), 1648w (C=C), 1467w, 1419w, 1369m, 1340w, 1306m, 1249s, 1179m, 1144m, 1096m, 1037m, 856s, 772w, 702w, 667m; δ<sub>H</sub> (300 MHz) 0.00 (9H, s, Si(CH<sub>3</sub>)<sub>3</sub>), 0.87-0.93 (6H, stack, (CH<sub>3</sub>)<sub>2</sub>CH), 1.13-1.29 (4H, stack including [1.53 (3H, t, *J* 7.1, CO<sub>2</sub>CH<sub>2</sub>CH<sub>3</sub>)], <sup>i</sup>PrCH<sub>a</sub>H<sub>b</sub>, CO<sub>2</sub>CH<sub>2</sub>CH<sub>3</sub>), 1.42-1.59 (3H, stack including [1.51 (2H, d, *J* 8.8, CH<sub>2</sub>Si(CH<sub>3</sub>)<sub>3</sub>)], <sup>i</sup>PrCH<sub>a</sub>H<sub>b</sub>, CH<sub>2</sub>Si(CH<sub>3</sub>)<sub>3</sub>), 1.66-1.83 (1H, m, (CH<sub>3</sub>)<sub>2</sub>CH), 2.39 (1H, A of ABX, *J*<sub>A-B</sub> 15.0,

$J_{A-X}$  6.1,  $CH_aH_bC=O$ ), 2.57 (1H, B of ABX,  $J_{B-A}$  15.0,  $J_{B-X}$  6.6,  $CH_aH_bC=O$ ), 3.76-3.87 (1H, m, 3-*H*), 3.97 (1H, A of ABX,  $J_{A-B}$  11.8,  $J_{A-X}$  6.8,  $OCH_aH_bCH=CH$ ), 4.06 (1H, B of ABX,  $J_{B-A}$  11.8,  $J_{B-X}$  6.5,  $OCH_aH_bCH=CH$ ), 4.14 (2H, q,  $J$  7.1,  $CO_2CH_2CH_3$ ), 5.37-5.45 (1H, m,  $OCH_2CH=CH$ ), 5.51-5.66 (1H, m,  $OCH_2CH=CH$ );  $\delta_C$  (75 MHz) -2.0 ( $CH_3$ ,  $Si(CH_3)_3$ ), 14.1 ( $CH_3$ ,  $OCH_2CH_3$ ), 19.1 ( $CH_2$ ,  $CH=CHCH_2Si$ ), [22.3, 23.1, 24.5 (2 x  $CH_3$ , 1 x  $CH$ ,  $(CH_3)_2CH$ )], 40.3 ( $CH_2$ ,  $CH_2C=O$ ), 44.2 ( $CH_2$ ,  $iPrCH_2$ ), 60.2 ( $CH_2$ ,  $OCH_2CH_3$ ), 64.8 ( $CH_2$ ,  $OCH_2CH=CH$ ), 74.1 ( $CH$ , C-3), 123.8 ( $CH$ ,  $CH=CH$ ), 129.2 ( $CH$ ,  $CH=CH$ ), 171.7 (quat. C,  $C=O$ );  $m/z$  (TOF ES+) 323.2 ( $[M+Na]^+$ , 100%); HRMS  $m/z$  (TOF ES+) 323.2010.  $C_{16}H_{32}NaO_3Si$  requires 323.2018.

**(Z) Ethyl 3-(4'-trimethylsilanyl-but-2'-enyloxy)butyrate (13d)**

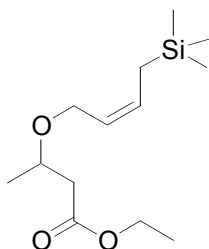

Raney nickel (a spatula tip) was added to solution of alkyne **12d** (0.350 g, 1.36 mmol) in EtOH (40 mL) at rt. The solution was charged with  $H_2$  gas (3 x vacuum- $H_2$  flushes) and the resulting solution stirred for 10 min under an atmosphere of  $H_2$ . Filtration and removal of the solvent under reduced pressure left a residue which was purified by flash column chromatography (10%  $Et_2O$  in hexane) to afford alkene **13d** as a colourless oil (0.341 g, 97%);  $R_f$  = 0.19 (10%  $Et_2O$  in hexane);  $\nu_{max}(\text{film})/\text{cm}^{-1}$  3583w, 2956s, 1738s ( $C=O$ ), 1650w ( $C=C$ ), 1448w, 1376m, 1334m, 1302m, 1249s, 1187s, 1144m, 1096s, 1033m, 948w, 918w, 858s, 729w, 702w, 666m;  $\delta_H$  (300 MHz) -0.01 (9H, s,  $Si(CH_3)_3$ ), 1.21 (3H, d,  $J$  6.3,  $CH_3$ ), 1.25 (3H, t,  $J$

7.1,  $\text{CO}_2\text{CH}_2\text{CH}_3$ ), 1.51 (2H, d,  $J$  8.8,  $\text{CH}_2\text{Si}(\text{CH}_3)_3$ ), 2.35 (1H, A of ABX,  $J_{\text{A-B}}$  15.1,  $J_{\text{A-X}}$  5.9,  $\text{CH}_a\text{CH}_b\text{C}=\text{O}$ ), 2.59 (1H, B of ABX,  $J_{\text{B-A}}$  15.1,  $J_{\text{B-X}}$  7.0,  $\text{CH}_a\text{H}_b\text{C}=\text{O}$ ), 3.82-4.03 (3H, stack,  $\text{OCH}_2\text{CH}=\text{CH}$ , 3- $H$ ), 4.13 (2H, q,  $J$  7.1,  $\text{CO}_2\text{CH}_2\text{CH}_3$ ), 5.41 (1H, dt,  $J$  11.0, 6.3,  $\text{OCH}_2\text{CH}=\text{CH}$ ), 5.52-5.67 (1H, m,  $\text{OCH}_2\text{CH}=\text{CH}$ );  $\delta_{\text{C}}$  (75 MHz) -1.9 ( $\text{CH}_3$ ,  $\text{Si}(\text{CH}_3)_3$ ), 14.2 ( $\text{CH}_3$ ,  $\text{OCHCH}_3$ ), 19.1 ( $\text{CH}_2$ ,  $\text{CH}=\text{CHCH}_2\text{Si}$ ), 19.9 ( $\text{CH}_3$ , C-4), 42.0 ( $\text{CH}_2$ ,  $\text{CH}_2\text{C}=\text{O}$ ), 60.2 ( $\text{CH}_2$ ,  $\text{OCH}_2\text{CH}_3$ ), 64.2 ( $\text{CH}_2$ ,  $\text{OCH}_2\text{CH}=\text{CH}$ ), 71.5 ( $\text{CH}$ , C-3), 123.8 ( $\text{CH}$ ,  $\text{CH}=\text{CH}$ ), 129.4 ( $\text{CH}$ ,  $\text{CH}=\text{CH}$ ), 171.5 (quat. C,  $\text{C}=\text{O}$ );  $m/z$  (TOF ES+) 281.1 ( $[\text{M}+\text{Na}]^+$ , 100%); HRMS  $m/z$  (TOF ES+) 281.1553.  $\text{C}_{13}\text{H}_{26}\text{NaO}_3\text{Si}$  requires 281.1549.

**(Z) Ethyl 5-benzyloxy-3-(4'-trimethylsilanyl-but-2'-enyloxy)pentanoate (13e)**

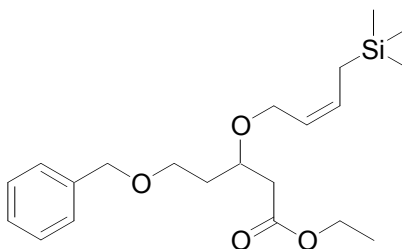

Raney nickel (a spatula tip) was added to a solution of alkyne **12e** (0.250 g, 0.66 mmol) in EtOH (19 mL) at rt. The solution was charged with  $\text{H}_2$  gas (3 x vacuum- $\text{H}_2$  flushes) and the resulting solution stirred for 10 min under an atmosphere of  $\text{H}_2$ . Filtration and removal of the solvent under reduced pressure left a residue which was purified by flash column chromatography (10%  $\text{Et}_2\text{O}$  in hexane) to afford alkene **13e** as a colourless oil (0.225 g, 90%);  $R_f$  = 0.22 (10%  $\text{Et}_2\text{O}$  in hexane);  $\nu_{\text{max}}(\text{film})/\text{cm}^{-1}$  3019m, 2954s, 2858m, 2354w, 1946w, 1890w, 1735s ( $\text{C}=\text{O}$ ), 1649w ( $\text{C}=\text{C}$ ), 1496w, 1454m, 1420m, 1373m, 1337m, 1306m, 1248s, 1214m, 1174s, 1096s, 1030m, 948w, 857s, 799w, 774w, 732m, 697m;  $\delta_{\text{H}}$  (300 MHz) -0.02 (9H, s,

Si(CH<sub>3</sub>)<sub>3</sub>), 1.25 (3H, t, *J* 7.2, CO<sub>2</sub>CH<sub>2</sub>CH<sub>3</sub>), 1.49 (2H, d, *J* 8.8, CH<sub>2</sub>Si(CH<sub>3</sub>)<sub>3</sub>), 1.85 (2H, app. q, *J* 6.3, BnOCH<sub>2</sub>CH<sub>2</sub>), 2.47 (1H, A of ABX, *J*<sub>A-B</sub> 15.1, *J*<sub>A-X</sub> 5.5, CH<sub>a</sub>H<sub>b</sub>C=O), 2.57 (1H, B of ABX, *J*<sub>B-A</sub> 15.1, *J*<sub>B-X</sub> 7.0, CH<sub>a</sub>H<sub>b</sub>C=O), 3.48-3.65 (2H, m, BnOCH<sub>2</sub>), 3.92-4.19 (5H, stack including [4.13 (2H, q, *J* 7.2, CO<sub>2</sub>CH<sub>2</sub>CH<sub>3</sub>], OCH<sub>2</sub>CH=CH, 3-*H*, CO<sub>2</sub>CH<sub>2</sub>CH<sub>3</sub>), 4.49 (2H, s, PhCH<sub>2</sub>), 5.38 (1H, dt, *J* 11.0, 6.6, OCH<sub>2</sub>CH=CH), 5.53-5.67 (1H, m, OCH<sub>2</sub>CH=CH), 7.23-7.43 (5H, stack, PhH); δ<sub>C</sub> (75 MHz) -2.0 (CH<sub>3</sub>, Si(CH<sub>3</sub>)<sub>3</sub>), 14.1 (CH<sub>3</sub>, OCH<sub>2</sub>CH<sub>3</sub>), 19.1 (CH<sub>2</sub>, CH=CHCH<sub>2</sub>Si), 34.7 (CH<sub>2</sub>, BnOCH<sub>2</sub>CH<sub>2</sub>), 40.2 (CH<sub>2</sub>, CH<sub>2</sub>C=O), 60.3 (CH<sub>2</sub>, OCH<sub>2</sub>CH<sub>3</sub>), 65.1 (CH<sub>2</sub>, (OCH<sub>2</sub>CH=CH), 66.5 (BnOCH<sub>2</sub>), 72.8 (CH<sub>2</sub>, PhCH<sub>2</sub>O), 73.0 (CH, C-3), 123.6 (CH, CH=CH), 127.4 (CH, Ph), 127.5 (CH, Ph), 128.2 (CH, Ph), 129.3 (CH, CH=CH), 138.3 (CH, *ipso*Ph), 171.5 (quat. C, C=O); *m/z* (TOF ES+) 401.3 ([M+Na]<sup>+</sup>, 100%), 485.2 (23, [M+Ag]<sup>+</sup>); HRMS *m/z* (TOF ES+) 401.2122. C<sub>21</sub>H<sub>34</sub>NaO<sub>4</sub>Si requires 401.2124.

**(Z) Ethyl 4-(*tert*-butyl-diphenyl-silanyloxy)-3-(4'-trimethylsilanyl-but-2'-enyloxy)butyrate (13f)**

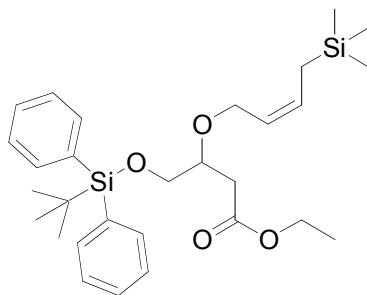

Raney nickel (a spatula tip) was added to a solution of alkyne **12f** (0.300 g, 0.59 mmol) in EtOH (18 mL) at rt. The solution was charged with H<sub>2</sub> gas (3 x vacuum-H<sub>2</sub> flushes) and the resulting solution stirred for 12 min under an atmosphere of H<sub>2</sub>. Filtration and removal of the solvent under reduced pressure left a residue which

was purified by flash column chromatography (10% Et<sub>2</sub>O in hexane) to afford alkene **13f** as a colourless oil (0.269 g, 89%);  $R_f$  = 0.23 (10% Et<sub>2</sub>O in hexane);  $\nu_{\max}(\text{film})$  /cm<sup>-1</sup> 3583w, 3379w, 3064w, 3029m, 2955s, 2364w, 1749s (C=O), 1648w (C=C), 1604w, 1496m, 1454m, 1370m, 1249s, 1205m, 1178s, 1110m, 1073m, 1029m, 855s, 731s, 696s, 666m;  $\delta_H$  (300 MHz) -0.04 (9H, s, Si(CH<sub>3</sub>)<sub>3</sub>), 1.04 (9H, s, C(CH<sub>3</sub>)<sub>3</sub>), 1.25 (3H, t,  $J$  7.2, CO<sub>2</sub>CH<sub>2</sub>CH<sub>3</sub>), 1.45 (2H, d,  $J$  8.5, CH<sub>2</sub>Si(CH<sub>3</sub>)<sub>3</sub>), 2.50 (1H, A of ABX,  $J_{A-B}$  15.6,  $J_{A-X}$  8.3, CH<sub>a</sub>CH<sub>b</sub>C=O), 2.66 (1H, B of ABX,  $J_{B-A}$  15.6,  $J_{B-X}$  4.6, CH<sub>a</sub>CH<sub>b</sub>C=O), 3.58 (1H, A of ABX,  $J_{A-B}$  10.4,  $J_{A-X}$  5.7, SiOCH<sub>a</sub>H<sub>b</sub>), 3.72 (1H, B of ABX,  $J_{B-A}$  10.4,  $J_{B-X}$  5.5, OSiCH<sub>a</sub>H<sub>b</sub>), 3.85-4.18 (5H, stack including [4.04 (1H, app. t,  $J$  6.6, OCH<sub>a</sub>H<sub>b</sub>CH=CH), [4.13 (2H, q,  $J$  7.2, CO<sub>2</sub>CH<sub>2</sub>CH<sub>3</sub>), 3-*H*, OCH<sub>a</sub>H<sub>b</sub>CH=CH, CO<sub>2</sub>CH<sub>2</sub>CH<sub>3</sub>), 5.31-5.43 (1H, m, OCH<sub>2</sub>CH=CH), 5.48-5.62 (1H, m, OCH<sub>2</sub>CH=CH), 7.33-7.46 (6H, stack, Ph*H*), 7.64-7.71 (4H, stack, Ph*H*);  $\delta_C$  (75 MHz) -1.9 (CH<sub>3</sub>, Si(CH<sub>3</sub>)<sub>3</sub>), 14.2 (CH<sub>3</sub>, OCH<sub>2</sub>CH<sub>3</sub>), 19.1 (quat. C, C(CH<sub>3</sub>)<sub>3</sub>), 19.2 (CH<sub>2</sub>, CH=CHCH<sub>2</sub>Si), 26.8 (CH<sub>3</sub>, C(CH<sub>3</sub>)<sub>3</sub>), 37.8 (CH<sub>2</sub>, CH<sub>2</sub>C=O), 60.4 (CH<sub>2</sub>, OCH<sub>2</sub>CH<sub>3</sub>), 65.3 (CH<sub>2</sub>), 66.0 (CH<sub>2</sub>), 76.2 (CH, C-3), 123.8 (CH, CH=CH), 127.6 (CH, *m*-Ph), 129.3 (CH, CH=CH), 129.6 (CH, *p*-Ph), [133.27, 133.34, (quat. C, *ipso*Ph)], [135.54, 135.56 (CH, *o*-Ph)], 171.7 (quat. C, C=O);  $m/z$  (TOF ES+) 535.3 ([M+Na]<sup>+</sup>, 100%); HRMS  $m/z$  (TOF ES+) 535.2669. C<sub>29</sub>H<sub>44</sub>NaO<sub>4</sub>Si<sub>2</sub> requires 535.2676.

**(Z) Ethyl 3-(furan-2'-yl)-3-(4''-trimethylsilanyl-but-2''-enyloxy)propionate (13g)**

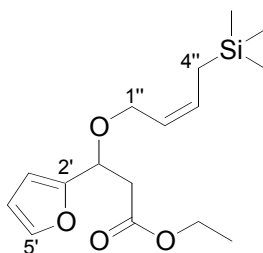

Raney nickel (a spatula tip) was added to a solution of alkyne **12g** (0.250 g, 0.81 mmol) in EtOH (24 mL) at rt. The solution was charged with H<sub>2</sub> gas (3 x vacuum-H<sub>2</sub> flushes) and the resulting solution stirred for 12 min under an atmosphere of H<sub>2</sub>. Filtration and removal of the solvent under reduced pressure left a residue which was purified by flash column chromatography (10% Et<sub>2</sub>O in hexane) to afford alkene **13g** as a colourless oil (0.234 g, 93%); *R<sub>f</sub>* = 0.19 (10% Et<sub>2</sub>O in hexane);  $\nu_{\text{max}}(\text{film})/\text{cm}^{-1}$  2955m, 2897m, 1740s (C=O), 1684w, 1653w (C=C), 1559w, 1540w, 1522w, 1506w, 1458w, 1419w, 1374m, 1352w, 1332w, 1287m, 1249s, 1210w, 1165m, 1078m, 1043m, 1012m, 926w, 855s, 738m, 703m, 665m;  $\delta_{\text{H}}$  (300 MHz) -0.03 (9H, s, Si(CH<sub>3</sub>)<sub>3</sub>), 1.24 (3H, t, *J* 7.0, CO<sub>2</sub>CH<sub>2</sub>CH<sub>3</sub>), 1.37 (2H, d, *J* 9.2, CH<sub>2</sub>Si(CH<sub>3</sub>)<sub>3</sub>), 2.76 (1H, A of ABX, *J*<sub>A-B</sub> 15.4, *J*<sub>A-X</sub> 5.6, CH<sub>a</sub>CH<sub>b</sub>C=O), 2.96 (1H, B of ABX, *J*<sub>B-A</sub> 15.4, *J*<sub>B-X</sub> 8.5, CH<sub>a</sub>CH<sub>b</sub>C=O), 3.95 (2H, d with unresolved fine coupling, *J* 5.5, OCH<sub>2</sub>CH=CH), 4.14 (2H, q, *J* 7.1, CO<sub>2</sub>CH<sub>2</sub>CH<sub>3</sub>), 4.83 (1H, dd, *J* 8.5, 5.6, 3-*H*), 5.35-5.48 (1H, m, OCH<sub>2</sub>CH=CH), 5.55-5.69 (1H, m, OCH<sub>2</sub>CH=CH), 6.28-6.41 (2H, stack, furyl CCHCH), 7.38-7.43 (1H, m, furyl OCH);  $\delta_{\text{C}}$  (75 MHz) -2.0 (CH<sub>3</sub>, Si(CH<sub>3</sub>)<sub>3</sub>), 14.1 (CH<sub>3</sub>, OCH<sub>2</sub>CH<sub>3</sub>), 19.1 (CH<sub>2</sub>, CH=CHCH<sub>2</sub>Si), 40.0 (CH<sub>2</sub>, CH<sub>2</sub>C=O), 60.4 (CH<sub>2</sub>, OCH<sub>2</sub>CH<sub>3</sub>), 64.3 (CH<sub>2</sub>, OCH<sub>2</sub>CH=CH), 70.2 (CH, C-3), 107.9 (CH, furyl CH), 109.9 (CH, furyl CH), 123.1 (CH, CH=CH), 130.1 (CH, CH=CH), 142.4 (CH, furyl OCH), 153.3 (quat. C, furyl C) 170.4 (quat. C, C=O); *m/z* (TOF ES<sup>+</sup>) 333.1

$[M+Na]^+$ , 100%); HRMS  $m/z$  (TOF ES+) 333.1487.  $C_{16}H_{26}NaO_4Si$  requires 333.1487.

**(4*E*, 2'*Z*) Ethyl 5-phenyl-3-(4'-trimethylsilanyl-but-2'-enyloxy)pent-4-enoate**  
**(13h)**

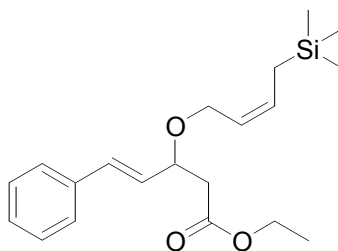

Raney nickel (a spatula tip) was added to a solution of alkyne **12h** (0.280 g, 0.81 mmol) in EtOH (23 mL) at rt. The solution was charged with H<sub>2</sub> gas (3 x vacuum-H<sub>2</sub> flushes) and the resulting solution was stirred for 10 min under an atmosphere of H<sub>2</sub>. Filtration and removal of the solvent under reduced pressure left a residue which was purified by flash column chromatography (10% Et<sub>2</sub>O in hexane) to afford alkene **13h** as a yellow oil (0.255 g, 91%);  $R_f$  = 0.23 (10% Et<sub>2</sub>O in hexane);  $\nu_{\max}(\text{film})/\text{cm}^{-1}$  3582w, 2954m, 2357w, 1737s (C=O), 1656w, 1649w, 1626m (C=C), 1547w, 1511w, 1495m, 1463w, 1449m, 1369m, 1248s, 1159s, 1094m, 1041m, 968m, 854s, 805w, 795w, 751, 692m, 665s;  $\delta_H$  (300 MHz) -0.03 (9H, s, Si(CH<sub>3</sub>)<sub>3</sub>), 1.24 (3H, t,  $J$  7.2, CO<sub>2</sub>CH<sub>2</sub>CH<sub>3</sub>), 1.48 (2H, d,  $J$  8.5, CH<sub>2</sub>Si(CH<sub>3</sub>)<sub>3</sub>), 2.52 (1H, A of ABX,  $J_{A-B}$  15.1,  $J_{A-X}$  5.5, CH<sub>a</sub>H<sub>b</sub>C=O), 2.71 (1H, B of ABX,  $J_{B-A}$  15.1,  $J_{B-X}$  8.1, CH<sub>a</sub>H<sub>b</sub>C=O), 3.94 (1H, A of ABX,  $J_{A-B}$  11.8,  $J_{A-X}$  7.0, OCH<sub>a</sub>H<sub>b</sub>CH=CH), 4.01 (1H, B of ABX,  $J_{B-A}$  11.8,  $J_{B-X}$  6.3, OCH<sub>a</sub>H<sub>b</sub>CH=CH), 4.14 (2H, q,  $J$  7.2, CO<sub>2</sub>CH<sub>2</sub>CH<sub>3</sub>), 4.37 (1H, app. q,  $J$  7.1, 3-*H*), 5.44 (1H, dt,  $J$  11.0, 7.0, OCH<sub>2</sub>CH=CH), 5.54-5.69 (1H, m, OCH<sub>2</sub>CH=CH), 6.10 (1H, dd,  $J$  16.0, 7.7, PhCH=CH), 6.61 (1H, d,  $J$  16.0, PhCH=CH), 7.22-7.48 (5H, stack, PhH);

$\delta_{\text{C}}$  (100 MHz) -1.9 (CH<sub>3</sub>, Si(CH<sub>3</sub>)<sub>3</sub>), 14.2 (CH<sub>3</sub>, OCH<sub>2</sub>CH<sub>3</sub>), 19.2 (CH<sub>2</sub>, CH=CHCH<sub>2</sub>Si), 41.4 (CH<sub>2</sub>, CH<sub>2</sub>C=O), 60.4 (CH<sub>2</sub>, OCH<sub>2</sub>CH<sub>3</sub>), 64.1 (CH<sub>2</sub>, OCH<sub>2</sub>CH=CH), 75.3 (CH, C-3), 123.5 (CH), 126.5 (CH), 127.8 (CH), 128.5 (CH), 128.8 (CH), 129.8 (CH), 132.6 (CH), 136.3 (quat. C, *ipso*Ph), 170.7 (quat. C, C=O);  $m/z$  (TOF ES<sup>+</sup>) 369.3 ([M+Na]<sup>+</sup>, 100%); HRMS  $m/z$  (TOF ES<sup>+</sup>) 369.1854. C<sub>20</sub>H<sub>30</sub>NaO<sub>3</sub>Si requires 369.1862.

### General procedure for DIBALH reduction: formation of **7**

DIBALH (1.1 equiv of a 1.5 M solution in toluene) was added dropwise over 30 min to a solution of ester **13** (1 equiv) in CH<sub>2</sub>Cl<sub>2</sub> (0.06 M reaction concentration) at -78 °C. After 1 h (consumption of the starting material was monitored by TLC), the reaction was quenched with MeOH (1 equiv) and H<sub>2</sub>O (6 equiv) at -78 °C, and the resulting slurry was allowed to warm to rt. It was then filtered through MgSO<sub>4</sub> and Celite and the solvent was evaporated under reduced pressure to leave a yellow liquid which was purified by flash column chromatography.

### (*Z*) 3-Phenyl-3-(4'-trimethylsilanyl-but-2'-enyloxy)propionaldehyde (**7a**)

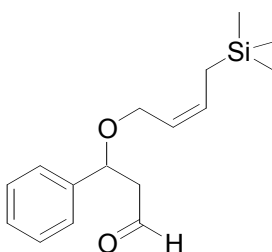

Aldehyde **7a** was prepared from ester **13a** (0.300 g, 0.94 mmol) and DIBALH (0.69 mL of a 1.5 M solution in toluene, 1.03 mmol) according to the general procedure.

After 1 h, work-up and purification by flash column chromatography (6% EtOAc in hexane) afforded aldehyde **7a** as a colourless oil (0.236 g, 91%);  $R_f$  = 0.22 (6% EtOAc in hexane);  $\nu_{\max}(\text{film})/\text{cm}^{-1}$  3583w, 3436w, 3064w, 3027m, 2955s, 2895m, 2726m, 1952w, 1727s (C=O), 1681m (C=C), 1647m (C=C), 1627w, 1604w, 1494m, 1454m, 1401m, 1335m, 1307m, 1289m, 1248s, 1217w, 1192w, 1146m, 1090s, 1041m, 921w, 855m, 762m, 702s, 666m;  $\delta_H$  (300 MHz) -0.07 (9H, s, Si(CH<sub>3</sub>)<sub>3</sub>), 1.37 (2H, d,  $J$  8.8, CH<sub>2</sub>Si(CH<sub>3</sub>)<sub>3</sub>), 2.59 (1H, A of ABXY,  $J_{A-B}$  16.5,  $J_{A-X}$  4.3,  $J_{A-Y}$  1.6, CH<sub>a</sub>H<sub>b</sub>C=O), 2.92 (1H, B of ABXY,  $J_{B-A}$  16.5,  $J_{B-X}$  9.0,  $J_{B-Y}$  2.4, CH<sub>a</sub>H<sub>b</sub>C=O), 3.79-3.97 (2H, m, OCH<sub>2</sub>CH=CH), 4.84 (1H, dd,  $J$  9.0, 4.3, 3-*H*), 5.42 (1H, dt,  $J$  10.3, 5.1, OCH<sub>2</sub>CH=CH), 5.55-5.68 (1H, m, OCH<sub>2</sub>CH=CH), 7.23-7.47 (5H, stack, Ph*H*), 9.80 (1H, app. t,  $J$  2.0, CHO);  $\delta_C$  (75 MHz) -2.5 (CH<sub>3</sub>, Si(CH<sub>3</sub>)<sub>3</sub>), 18.7 (CH<sub>2</sub>, CH=CHCH<sub>2</sub>Si), 51.5 (CH<sub>2</sub>, CH<sub>2</sub>C=O), 64.1 (CH<sub>2</sub>, OCH<sub>2</sub>CH=CH), 76.1 (CH, C-3), 123.3 (CH, CH=CH), 126.8 (CH, Ph), 128.3 (CH, Ph), 128.9 (CH, Ph), 130.6 (CH, CH=CH), 141.2 (quat. C, *ipso*Ph), 201.4 (CH, C=O);  $m/z$  (TOF ES+) 299.1 ([M+Na]<sup>+</sup>, 100%), 331.1 (93, [M+Na+MeOH]<sup>+</sup>); HRMS  $m/z$  (TOF ES+) 299.1454. C<sub>16</sub>H<sub>24</sub>NaO<sub>2</sub>Si requires 299.1443.

**(Z) 3-(4'-trimethylsilanyl-but-2'-enyloxy)heptanal (7b)**

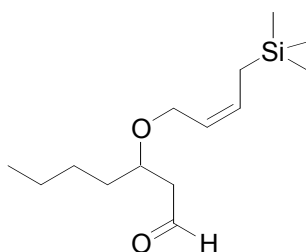

Aldehyde **7b** was prepared from ester **13b** (0.250 g, 0.83 mmol) and DIBALH (0.61 mL of a 1.5 M solution in toluene, 0.91 mmol) according to the general procedure.

After 1 h, work-up and purification by flash column chromatography (6% Et<sub>2</sub>O in hexane) afforded aldehyde **7b** as a colourless oil (0.204 g, 96%); *R*<sub>f</sub> = 0.20 (6% Et<sub>2</sub>O in hexane);  $\nu_{\text{max}}(\text{film})/\text{cm}^{-1}$  3234w, 3019m, 2956s, 2862m, 2724w, 2368w, 2340w, 1726s (C=O), 1691w, 1679w, 1650m (C=C), 1548w, 1529w, 1513w, 1468m, 1415m, 1379m, 1336m, 1249s, 1147m, 1077m, 915w, 855s, 773w, 733m, 702m, 666m;  $\delta_{\text{H}}$  (300 MHz) 0.00 (9H, s, Si(CH<sub>3</sub>)<sub>3</sub>), 0.90 (3H, t, *J* 7.0, CH<sub>3</sub>), 1.24-1.41 (4H, stack 2 x CH<sub>2</sub>), 1.42-1.55 (4H, stack including [1.50 (2H, d, *J* 8.8, CH<sub>2</sub>Si(CH<sub>3</sub>)<sub>3</sub>)], 1 x CH<sub>2</sub>, CH<sub>2</sub>Si(CH<sub>3</sub>)<sub>3</sub>), 2.51 (1H, A of ABXY, *J*<sub>A-B</sub> 16.3, *J*<sub>A-X</sub> 5.0, *J*<sub>A-Y</sub> 2.0, CH<sub>a</sub>H<sub>b</sub>C=O), 2.62 (1H, B of ABXY, *J*<sub>B-A</sub> 16.3, *J*<sub>B-X</sub> 7.0, *J*<sub>B-Y</sub> 2.4, CH<sub>a</sub>H<sub>b</sub>C=O), 3.83 (1H, app. quintet, *J* 6.0, 3-*H*), 4.00 (2H, d, *J* 6.6, OCH<sub>2</sub>CH=CH), 5.40 (1H, dt with unresolved fine coupling, *J* 11.0, 6.6, OCH<sub>2</sub>CH=CH), 5.51-5.69 (1H, m, OCH<sub>2</sub>CH=CH), 9.81 (1H, app. t, *J* 2.4, CHO);  $\delta_{\text{C}}$  (75 MHz) -2.0 (CH<sub>3</sub>, Si(CH<sub>3</sub>)<sub>3</sub>), 13.9 (CH<sub>3</sub>, CH<sub>3</sub>(CH<sub>2</sub>)<sub>3</sub>), 19.1 (CH<sub>2</sub>, CH=CHCH<sub>2</sub>Si), 22.6 (CH<sub>2</sub>), 27.2 (CH<sub>2</sub>), 34.0 (CH<sub>2</sub>), 48.3 (CH<sub>2</sub>, CH<sub>2</sub>C=O), 64.5 (OCH<sub>2</sub>CH=CH), 74.1 (CH, C-3), 123.5 (CH, CH=CH), 129.6 (CH, CH=CH), 201.7 (CH, C=O); *m/z* (TOF ES<sup>+</sup>) 279 ([M+Na]<sup>+</sup>, 100%), 311 (96, [M+Na+MeOH]<sup>+</sup>); HRMS *m/z* (TOF ES<sup>+</sup>) 279.1759. C<sub>14</sub>H<sub>28</sub>NaO<sub>2</sub>Si requires 279.1756.

**(Z) 5-Methyl-3-(4'-trimethylsilanyl-but-2'-enyloxy)hexanal (7c)**

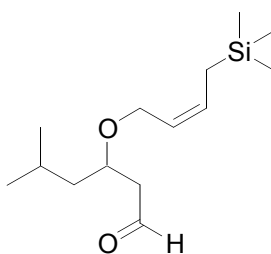

Aldehyde **7c** was prepared from ester **13c** (0.250 g, 0.83 mmol) and DIBALH (0.61 mL of a 1.5 M solution in toluene, 0.91 mmol) according to the general procedure.

After 1 h, work-up and purification by flash column chromatography (6% Et<sub>2</sub>O in hexane) afforded aldehyde **7c** as a colourless oil (0.201 g, 94%); *R<sub>f</sub>* = 0.26 (6% Et<sub>2</sub>O in hexane);  $\nu_{\text{max}}(\text{film})/\text{cm}^{-1}$  3583w, 3444w, 3030w, 2954s, 2360w, 1731s (C=O), 1646w (C=C), 1494w, 1454m, 1418m, 1249s, 1098s, 854s, 670s, 666s; (300 MHz) - 0.00 (9H, s, Si(CH<sub>3</sub>)<sub>3</sub>), 0.89-0.94 (6H, stack, (CH<sub>3</sub>)<sub>2</sub>CH), 1.16-1.32 (1H, m, <sup>i</sup>PrCH<sub>a</sub>H<sub>b</sub>), 1.41-1.63 (3H, stack including [1.51 (2H, d, *J* 9.2, CH<sub>2</sub>Si(CH<sub>3</sub>)<sub>3</sub>)], <sup>i</sup>PrCH<sub>a</sub>H<sub>b</sub>, CH<sub>2</sub>Si(CH<sub>3</sub>)<sub>3</sub>), 1.65-1.83 (1H, m, (CH<sub>3</sub>)<sub>2</sub>CH), 2.55-2.60 (2H, stack, CH<sub>2</sub>C=O), 3.84-3.93 (1H, m, 3-*H*), 3.97-4.04 (2H, stack, OCH<sub>2</sub>CH=CH), 5.35-5.44 (1H, m, OCH<sub>2</sub>CH=CH), 5.54-5.68 (1H, m, OCH<sub>2</sub>CH=CH), 9.82-9.83 (1H, m, CHO);  $\delta_{\text{C}}$  (75 MHz) -1.9 (CH<sub>3</sub>, Si(CH<sub>3</sub>)<sub>3</sub>), 19.2 (CH<sub>2</sub>, CH=CHCH<sub>2</sub>Si), [22.5, 22.9, 24.6 (2 x CH<sub>3</sub>, 1 x CH, (CH<sub>3</sub>)<sub>2</sub>CH)], 44.1 (CH<sub>2</sub>, <sup>i</sup>PrCH<sub>2</sub>), 48.6 (CH<sub>2</sub>, CH<sub>2</sub>C=O), 64.6 (CH<sub>2</sub>, OCH<sub>2</sub>CH=CH), 72.6 (CH, C-3), 123.5 (CH, CH=CH), 129.8 (CH, CH=CH), 201.8 (CH, C=O); *m/z* (TOF ES+) 311 ([M+Na+MeOH]<sup>+</sup>, 95%), 279 (100, [M+Na]<sup>+</sup>); HRMS *m/z* (TOF ES+) 279.1758. C<sub>14</sub>H<sub>28</sub>NaO<sub>2</sub>Si requires 279.1756.

**(Z) 3-(4'-Trimethylsilanyl-but-2'-enyloxy)butanal (7d)**

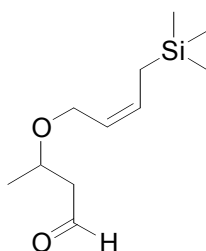

Aldehyde **7d** was prepared from ester **13d** (0.210 g, 0.98 mmol) and DIBALH (0.72 mL of a 1.5 M solution in toluene, 1.08 mmol) according to the general procedure. After 1 h, work-up and purification by flash column chromatography (6% Et<sub>2</sub>O in hexane) afforded aldehyde **7d** as a colourless oil (1.912 g, 91%); *R<sub>f</sub>* = 0.18 (6%

Et<sub>2</sub>O in hexane);  $\nu_{\max}(\text{film})/\text{cm}^{-1}$  3583w, 3435w, 3018w, 2956s, 2856s, 2724w, 1727s (C=O), 1647w (C=C), 1455w, 1418w, 1376m, 1330m, 1249s, 1146m, 1113m, 1070m, 1044m, 855s, 772w, 729w, 701m, 666m;  $\delta_{\text{H}}$  (300 MHz) 0.00 (9H, s, Si(CH<sub>3</sub>)<sub>3</sub>), 1.24 (3H, d, *J* 6.3, CH<sub>3</sub>), 1.51 (2H, d, *J* 8.8, CH<sub>2</sub>Si(CH<sub>3</sub>)<sub>3</sub>), 2.47 (1H, A of ABXY, *J*<sub>A-B</sub> 16.4, *J*<sub>A-X</sub> 5.1, *J*<sub>A-Y</sub> 2.0, CH<sub>a</sub>CH<sub>b</sub>C=O), 2.65 (1H, B of ABXY, *J*<sub>B-A</sub> 16.4, *J*<sub>B-X</sub> 7.2, *J*<sub>B-Y</sub> 2.3, CH<sub>a</sub>CH<sub>b</sub>C=O), 3.87-4.13 (3H, stack, OCH<sub>2</sub>CH=CH, 3-*H*), 5.40 (1H, dt, *J* 10.7, 6.6, OCH<sub>2</sub>CH=CH), 5.56-5.65 (1H, m, OCH<sub>2</sub>CH=CH), 9.79 (1H, app. t, *J* 2.2, CHO);  $\delta_{\text{C}}$  (75 MHz) -2.4 (CH<sub>3</sub>, Si(CH<sub>3</sub>)<sub>3</sub>), 18.8 (CH<sub>2</sub>, CH=CHCH<sub>2</sub>Si), 19.5 (CH<sub>3</sub>, C-4), 50.3 (CH<sub>2</sub>, CH<sub>2</sub>C=O), 63.9 (CH<sub>2</sub>, OCH<sub>2</sub>CH=CH), 69.9 (CH, C-3), 123.7 (CH, CH=CH), 130.1 (CH, CH=CH), 202.2 (CH, C=O); *m/z* (TOF ES+) 237.1 ([M+Na]<sup>+</sup>, 100%), 269.2 (97, [M+Na+MeOH]<sup>+</sup>); HRMS *m/z* (TOF ES+) 237.1283. C<sub>11</sub>H<sub>22</sub>NaO<sub>2</sub>Si requires 237.1287.

**(Z) 5-Benzyloxy-3-(4'-trimethylsilanyl-but-2'-enyloxy)pentanal (7e)**

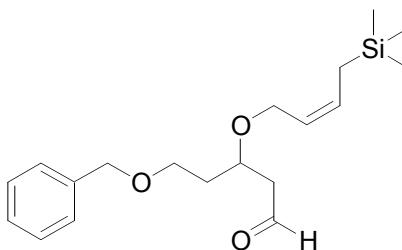

Aldehyde **7e** was prepared from ester **13e** (0.200 g, 0.53 mmol) and DIBALH (0.39 mL of a 1.5 M solution in toluene, 0.59 mmol) according to the general procedure. After 1 h, work-up and purification by flash column chromatography (6% Et<sub>2</sub>O in hexane) afforded aldehyde **7e** as a colourless oil (0.157 g, 89%); *R<sub>f</sub>* = 0.26 (6% EtOAc in hexane);  $\nu_{\max}(\text{film})/\text{cm}^{-1}$  3583w, 3430w, 3027w, 2954s, 2859s, 2726w, 1725s (C=O), 1646w (C=C), 1496w, 1454m, 1418w, 1362m, 1337w, 1248s, 1205w,

1099s, 855s, 773w, 736m, 698m, 666m;  $\delta_{\text{H}}$  (300 MHz) -0.01 (9H, s,  $\text{Si}(\text{CH}_3)_3$ ), 1.50 (2H, d,  $J$  8.8,  $\text{CH}_2\text{Si}(\text{CH}_3)_3$ ), 1.76-1.99 (2H, m,  $\text{BnOCH}_2\text{CH}_2$ ), 2.57-2.65 (2H, m,  $\text{CH}_2\text{C}=\text{O}$ ), 3.49-3.66 (2H, m,  $\text{BnOCH}_2$ ), 3.91-4.16 (3H, stack,  $\text{OCH}_2\text{CH}=\text{CH}$ , 3- $H$ ), 4.49 (2H, s,  $\text{PhCH}_2\text{O}$ ), 5.39 (1H, dt,  $J$  10.7, 6.6,  $\text{OCH}_2\text{CH}=\text{CH}$ ), 5.54-5.68 (1H, m,  $\text{OCH}_2\text{CH}=\text{CH}$ ), 7.20-7.42 (5H, stack,  $\text{PhH}$ ), 9.79 (1H, app. t,  $J$  2.0,  $\text{CHO}$ );  $\delta_{\text{C}}$  (75 MHz) -1.9 ( $\text{CH}_3$ ,  $\text{Si}(\text{CH}_3)_3$ ), 19.1 ( $\text{CH}_2$ ,  $\text{CH}=\text{CHCH}_2\text{Si}$ ), 34.6 ( $\text{CH}_2$ ,  $\text{BnOCH}_2\text{CH}_2$ ), 48.5 ( $\text{CH}_2$ ,  $\text{CH}_2\text{C}=\text{O}$ ), 64.9 ( $\text{CH}_2$ ), 66.3 ( $\text{CH}_2$ ), 71.5 ( $\text{CH}$ , C-3), 72.9 ( $\text{CH}_2$ ,  $\text{PhCH}_2\text{O}$ ), 123.3 ( $\text{CH}$ ,  $\text{CH}=\text{CH}$ ), 127.52 ( $\text{CH}$ , Ph), 127.54 ( $\text{CH}$ , Ph), 128.3 ( $\text{CH}$ , Ph), 129.8 ( $\text{CH}$ ,  $\text{CH}=\text{CH}$ ), 138.2 (quat. C, *ipso*Ph), 201.4 ( $\text{CH}$ ,  $\text{C}=\text{O}$ );  $m/z$  (TOF ES+) 357.2 ( $[\text{M}+\text{Na}]^+$ , 92%), 389.2 [92,  $[\text{M}+\text{Na}+\text{MeOH}]^+$ ]; HRMS  $m/z$  (TOF ES+) 357.1871.  $\text{C}_{19}\text{H}_{30}\text{NaO}_3\text{Si}$  requires 357.1862.

**(Z) 4-(tert-Butyl-diphenyl-silanyloxy)-3-(4'-trimethylsilanyl-but-2'-enyloxy)butanal (7f)**

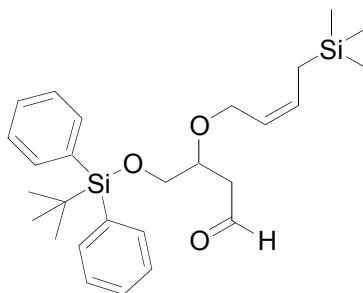

Aldehyde **7f** was prepared from ester **13f** (0.200 g, 0.39 mmol) and DIBALH (0.29 mL of a 1.5 M solution in toluene, 0.44 mmol) according to the general procedure. After 1 h, work-up and purification by flash column chromatography (6%  $\text{Et}_2\text{O}$  in hexane) afforded aldehyde **7f** as a colourless oil (0.159 g, 87%);  $R_f$  = 0.22 (6%  $\text{Et}_2\text{O}$  in hexane);  $\nu_{\text{max}}(\text{film})/\text{cm}^{-1}$  3583w, 3072m, 3017m, 2955s, 2939s, 2894s, 2858s, 2723s, 2360w, 2342w, 1728s ( $\text{C}=\text{O}$ ), 1648w ( $\text{C}=\text{C}$ ), 1590w, 1472m, 1428s, 1390m,

1362m, 1333w, 1248s, 1188w, 1113s, 1000m, 998m, 940w, 854s, 825s, 741s, 702s, 666m, 614s;  $\delta_{\text{H}}$  (300 MHz) -0.04 (9H, s, Si(CH<sub>3</sub>)<sub>3</sub>), 1.04 (9H, s, C(CH<sub>3</sub>)<sub>3</sub>), 1.45 (2H, d, *J* 8.8, CH<sub>2</sub>Si(CH<sub>3</sub>)<sub>3</sub>), 2.63-2.69 (2H, stack, CH<sub>2</sub>C=O), 3.61 (1H, A of ABX, *J*<sub>A-B</sub> 10.3, *J*<sub>A-X</sub> 5.9, SiOCH<sub>a</sub>H<sub>b</sub>), 3.74 (1H, B of ABX, *J*<sub>B-A</sub> 10.3, *J*<sub>B-X</sub> 5.0, SiOCH<sub>a</sub>H<sub>b</sub>), 3.88-4.08 (3H, stack, OCH<sub>2</sub>CH=CH, 3-*H*), 5.35 (1H, dt, *J* 10.7, 6.6, OCH<sub>2</sub>CH=CH), 5.55-5.68 (1H, m, OCH<sub>2</sub>CH=CH), 7.31-7.49 (6H, stack, Ph*H*), 7.57-7.69 (4H, stack, Ph*H*), 9.82 (1H, app. t, *J* 2.0, CHO);  $\delta_{\text{C}}$  (75 MHz) -1.9 (CH<sub>3</sub>, Si(CH<sub>3</sub>)<sub>3</sub>), 19.16 (quat. C, C(CH<sub>3</sub>)<sub>3</sub>), 19.22 (CH<sub>2</sub>, CH=CHCH<sub>2</sub>Si), 26.8 (CH<sub>3</sub>, C(CH<sub>3</sub>)<sub>3</sub>), 46.4 (CH<sub>2</sub>, CH<sub>2</sub>C=O), 65.2 (CH<sub>2</sub>), 65.6 (CH<sub>2</sub>), 74.6 (CH, C-3), 123.4 (CH, CH=CH), 127.7 (CH, *m*-Ph), 129.8 (CH, CH=CH), 129.9 (CH, *p*-Ph), [133.1, 133.2 (quat. C, *ipso*Ph)], [135.5, 135.6 (CH, *o*-Ph)], 201.4 (CH, C=O); *m/z* (TOF ES<sup>+</sup>) 523.2 ([M+Na+MeOH]<sup>+</sup>, 100%), 491.3 (25, [M+Na]<sup>+</sup>); HRMS *m/z* (TOF ES<sup>+</sup>) 491.2435. C<sub>27</sub>H<sub>40</sub>NaO<sub>3</sub>Si<sub>2</sub> requires 491.2412.

**(Z) 3-Furan-2'-yl-3-(4''-trimethylsilanyl-but-2''-enyloxy)propionaldehyde (7g)**

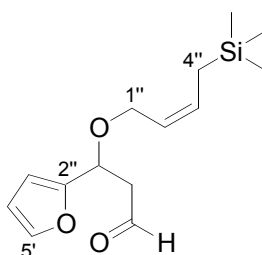

Aldehyde **7g** was prepared from ester **13g** (0.180 g, 0.58 mmol) and DIBALH (0.43 mL of a 1.5 M solution in toluene, 0.64 mmol) according to the general procedure. After 1 h, work-up and purification by flash column chromatography (6% Et<sub>2</sub>O in hexane) afforded aldehyde **7g** as a colourless oil (0.138 g, 89%); *R<sub>f</sub>* = 0.20 (6% Et<sub>2</sub>O in hexane);  $\nu_{\text{max}}$ (film)/cm<sup>-1</sup> 3583w, 3120w, 2955m, 2894m, 2726w, 1728s

(C=O), 1647w (C=C), 1504w, 1401w, 1326w, 1249s, 1150m, 1079s, 1041m, 1011m, 928w, 855s, 740m, 702w, 666m; (300 MHz) -0.03 (9H, s, Si(CH<sub>3</sub>)<sub>3</sub>), 1.46 (2H, d, *J* 9.6, CH<sub>2</sub>Si(CH<sub>3</sub>)<sub>3</sub>), 2.81 (1H, A of ABXY, *J*<sub>A-B</sub> 16.6, *J*<sub>A-X</sub> 4.9, *J*<sub>A-Y</sub> 1.5, CH<sub>a</sub>H<sub>b</sub>C=O), 3.06 (1H, B of ABXY, *J*<sub>B-A</sub> 16.6, *J*<sub>B-X</sub> 8.4, *J*<sub>B-Y</sub> 2.6, CH<sub>a</sub>H<sub>b</sub>C=O), 3.91-3.99 (2H, stack, OCH<sub>2</sub>CH=CH), 4.88 (1H, dd, *J* 8.4, 4.9, 3-*H*), 5.40 (1H, dt, *J* 10.7, 6.6, OCH<sub>2</sub>CH=CH), 5.57-5.71 (1H, m, OCH<sub>2</sub>CH=CH), 6.32-6.33 (1H, m, furyl CH), 6.35-6.37 (1H, m, furyl CH), 7.41 (1H, d, *J* 1.1, 5'-*H*), 9.80-9.81 (1H, m, CHO); δ<sub>C</sub> (75 MHz) -1.9 (CH<sub>3</sub>, Si(CH<sub>3</sub>)<sub>3</sub>), 19.2 (CH<sub>2</sub>, CH=CHCH<sub>2</sub>Si), 47.8 (CH<sub>2</sub>, CH<sub>2</sub>C=O), 64.1 (CH<sub>2</sub>, OCH<sub>2</sub>CH=CH), 68.7 (CH, C-3), 108.3 (CH, furyl CH), 110.1 (CH, furyl CH), 122.8 (CH, CH=CH), 130.6 (CH, CH=CH), 142.6 (CH, furyl OCH), 152.9 (quat. C, furyl C), 202.2 (CH, C=O); *m/z* (TOF ES<sup>+</sup>) 321.4 ([M+Na+MeOH]<sup>+</sup>, 98%), 289.4 (100, [M+Na]<sup>+</sup>); HRMS *m/z* (TOF ES<sup>+</sup>) 289.1230. C<sub>14</sub>H<sub>22</sub>NaO<sub>3</sub>Si requires 289.1236.

**(4 *E*, 2' *Z*) 5-Phenyl-3-(4'-trimethylsilylbut-2'-enyloxy)pent-4-enal (7h)**

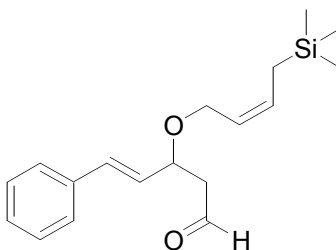

Aldehyde **7h** was prepared from ester **13h** (0.220 g, 0.73 mmol) and DIBALH (0.53 mL of a 1.5 M solution in toluene, 0.80 mmol) according to the general procedure. After 1 h, work-up and purification by flash column chromatography (6 % Et<sub>2</sub>O in hexane) afforded aldehyde **7h** as a yellow oil (0.203 g, 92%); *R<sub>f</sub>* = 0.20 (6% Et<sub>2</sub>O in hexane); ν<sub>max</sub>(film)/cm<sup>-1</sup> 3433w, 3023m, 2954s, 2727m, 1950w, 1726s (C=O), 1679m (OCH<sub>2</sub>CH=CH), 1621m (PhCH=CH), 1994 w, 1450w, 1405m, 1332m, 1250s,

1148m, 1078s, 972m, 852s, 749m, 695m, 663m;  $\delta_{\text{H}}$  (300 MHz) -0.03 (9H, s,  $\text{Si}(\text{CH}_3)_3$ ), 1.49 (2H, d,  $J$  8.8,  $\text{CH}_2\text{Si}(\text{CH}_3)_3$ ), 2.60 (1H, A of ABXY,  $J_{\text{A-B}}$  16.3,  $J_{\text{A-X}}$  4.9,  $J_{\text{A-Y}}$  1.8,  $\text{CH}_a\text{H}_b\text{C}=\text{O}$ ), 2.80 (1H, B of ABXY,  $J_{\text{B-A}}$  16.3,  $J_{\text{B-X}}$  8.0,  $J_{\text{B-Y}}$  2.5,  $\text{CH}_a\text{H}_b\text{C}=\text{O}$ ), 3.95 (1H, ABX,  $J_{\text{A-B}}$  11.7,  $J_{\text{A-X}}$  7.0,  $\text{OCH}_a\text{H}_b\text{CH}=\text{CH}$ ), 4.08 (1H, B of ABX,  $J_{\text{B-A}}$  11.7,  $J_{\text{B-X}}$  6.1,  $\text{OCH}_a\text{H}_b\text{CH}=\text{CH}$ ), 4.45 (1H, td,  $J$  8.0, 4.9, 3- $H$ ), 5.43 (1H, dt,  $J$  11.0, 6.6,  $\text{OCH}_2\text{CH}=\text{CH}$ ), 5.44-5.67 (1H, m,  $\text{OCH}_2\text{CH}=\text{CH}$ ), 6.11 (1H, dd,  $J$  15.9, 8.0,  $\text{PhCH}=\text{CH}$ ), 6.63 (1H, d,  $J$  15.9,  $\text{PhCH}=\text{CH}$ ), 7.22-7.45 (5H, stack,  $\text{PhH}$ ), 9.81 (1H, app. t,  $J$  2.1,  $\text{CHO}$ );  $\delta_{\text{C}}$  (75 MHz) -1.9 ( $\text{CH}_3$ ,  $\text{Si}(\text{CH}_3)_3$ ), 19.3 ( $\text{CH}_2$ ,  $\text{CH}=\text{CHCH}_2\text{Si}$ ), 49.5 ( $\text{CH}_2$ ,  $\text{CH}_2\text{C}=\text{O}$ ), 64.0 ( $\text{CH}_2$ ,  $\text{OCH}_2\text{CH}=\text{CH}$ ), 74.9 ( $\text{CH}$ , C-3), 123.1 ( $\text{CH}$ ), 126.5 ( $\text{CH}$ ), 128.0 ( $\text{CH}$ ), 128.5 ( $\text{CH}$ ), 128.6 ( $\text{CH}$ ), 130.3 ( $\text{CH}$ ), 132.8 ( $\text{CH}$ ), 136.0 (quat. C, *ipso*Ph), 201.0 ( $\text{CH}$ ,  $\text{C}=\text{O}$ );  $m/z$  (TOF ES+) 325.2 ( $[\text{M}+\text{Na}]^+$ , 100%), 357.2 (87,  $[\text{M}+\text{Na}+\text{MeOH}]^+$ ); HRMS  $m/z$  (TOF ES+) 325.1607.  $\text{C}_{18}\text{H}_{26}\text{NaO}_2\text{Si}$  requires 325.1600.

### General procedure for allylation reactions: formation of **14**

$\text{MeSO}_3\text{H}$  (1.1 equiv) was added to a solution of aldehyde **7** (1.0 equiv) in toluene (0.1 M reaction concentration) at  $-78^\circ\text{C}$  and the reaction was stirred for 30-50 min (consumption of the starting material was monitored by TLC). The reaction was then quenched by the addition of  $\text{NaHCO}_3$  solution (1 x volume of organic phase) at  $-78^\circ\text{C}$  and then the reaction mixture was allowed to warm to rt over 30 min. The two phases were separated and the aqueous phase was extracted with  $\text{CH}_2\text{Cl}_2$  (2 x volumes of aqueous phase). The combined organic extracts were washed with water (1 x volume of organic phase) and brine (1 x volume of organic phase) and dried over  $\text{MgSO}_4$ . Filtration and evaporation under reduced pressure produced the homoallylic alcohol as a mixture of two diastereoisomers (**14,15**), which were

separated by flash column chromatography. Reactions were carried out a minimum of two times.

**(2*S*\*, 4*R*\*, 5*S*\*) 4-Hydroxy-2-phenyl-5-vinyl-tetrahydropyran (**14a**)**

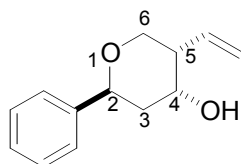

Aldehyde **7a** (0.220 g, 0.80 mmol) was reacted with MeSO<sub>3</sub>H (57  $\mu$ L, 0.88 mmol) according to the general procedure. After 45 min, work-up provided a mixture of alcohol diastereoisomers **14a** and **14b** (>50:1 **14a**:**14b**, quantitative yield). Purification of this mixture by flash column chromatography afforded the major alcohol **14a** as a white crystalline solid (0.144 g, 88%): mp 58-60 °C;  $R_f$  = 0.21 (20% EtOAc in hexane); (Found: C, 76.54; H, 7.70. C<sub>13</sub>H<sub>16</sub>O<sub>2</sub> requires C, 76.44; H, 7.90%);  $\nu_{\max}$ (film)/cm<sup>-1</sup> 3582w, 3407s br (OH), 3065w, 3030w, 2921s, 2852s, 2348w, 1962w, 1727w, 1640m (C=C), 1605w, 1496m, 1453s, 1421m, 1370m, 1290m, 1249m, 1184m, 1142s, 1082s, 1029s, 994m, 919m, 896m, 854m, 803w, 759s, 699s, 665s;  $\delta_H$  (300 MHz) 1.75 (1H, s, OH), 1.86 (1H, ddd,  $J$  14.1, 11.6, 2.8, 3- $H_{ax}$ ), 2.05 (1H, app. dt,  $J$  14.1, 2.7, 3- $H_{eq}$ ), 2.55-2.69 (1H, m, 5- $H$ ), 3.86-4.03 (2H, stack, 6- $H_{ax}$ , 6- $H_{eq}$ ), 4.14-4.22 (1H, m, 4- $H$ ), 4.78 (1H, dd,  $J$  11.6, 2.4, 2- $H$ ), 5.16 (1H, d with unresolved fine coupling,  $J$  17.6, CH=CH<sub>cis</sub>H<sub>trans</sub>), 5.26 (1H, d with unresolved fine coupling,  $J$  10.7, CH=CH<sub>cis</sub>H<sub>trans</sub>), 5.83 (1H, ddd,  $J$  17.6, 10.7, 6.4, CH=CH<sub>2</sub>), 7.20-7.42 (5H, stack, PhH);  $\delta_C$  (125 MHz) 40.3 (CH<sub>2</sub>, C-3), 44.0 (CH, C-5), 65.7 (CH<sub>2</sub>, C-6), 66.7 (CH, C-4), 73.3 (CH, C-2), 117.6 (CH<sub>2</sub>, CH=CH<sub>2</sub>), 125.8 (CH, Ph), 127.4 (CH, Ph), 128.3 (CH, Ph), 135.8 (CH, CH=CH<sub>2</sub>), 142.4 (quat. C, *ipso*Ph);  $m/z$  (EI) 204 ([M]<sup>+</sup>, 7%), 184 (19), 159 (17), 148 (13), 120 (32), 105 (100), 91 (13,

[PhCH<sub>2</sub>]<sup>+</sup>, 77 (31, [Ph]<sup>+</sup>), 70 (88), 54 (66), 43 (7); HRMS *m/z* (EI) 204.1155. C<sub>13</sub>H<sub>16</sub>O<sub>2</sub> requires 204.1150. The structure of this product was also confirmed by X-ray crystallography.

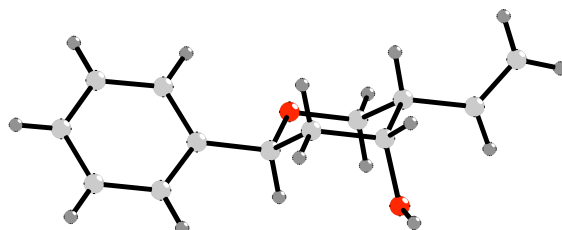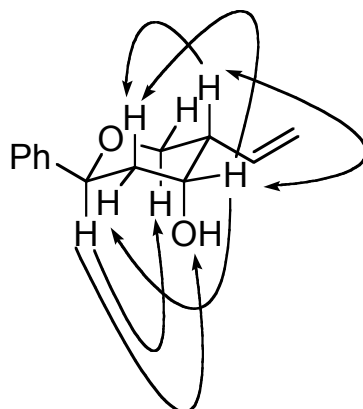

Selected nOes (GOESY) for **14a**

**(2*R*\*, 4*R*\*, 5*S*\*) 2-Butyl-4-hydroxy-5-vinyl-tetrahydropyran (**14b**)**

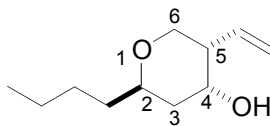

Aldehyde **7b** (0.210 g, 0.82 mmol) was reacted with MeSO<sub>3</sub>H (58  $\mu$ L, 0.90 mmol) according to the general procedure. After 50 min, work-up provided a mixture of alcohol diastereoisomers **14b** and **15b** (50:1 **14b**:**15b**, 96%). Flash column chromatography of this mixture afforded the major alcohol **14b** as a colourless oil (0.138 g, 91%);  $R_f$  = 0.22 (20% EtOAc in hexane);  $\nu_{\max}(\text{film})/\text{cm}^{-1}$  3442s br (OH), 3076m, 2930s, 2866s, 1840w, 1684w, 1640m (C=C), 1461m, 1421m, 1380m, 1282m, 1225m, 1082s, 1060s, 1000s, 919m, 866m, 776w, 710m, 663m;  $\delta_H$  (300 MHz) 0.88 (3H, t,  $J$  7.0, CH<sub>3</sub>), 1.21-1.43 (6H, stack, CH<sub>3</sub>(CH<sub>2</sub>)<sub>3</sub>), 1.50 (1H, app. t with unresolved fine coupling,  $J$  12.7, 3- $H_{\text{ax}}$ ), 1.73 (1H, s, OH), 1.79 (1H, d with unresolved fine coupling,  $J$  13.2, 3- $H_{\text{eq}}$ ), 2.41-2.51 (1H, m, 4-H), 3.61-3.79 (3H, stack, 2-H, 6- $H_{\text{ax}}$ , 6- $H_{\text{eq}}$ ), 4.11-4.19 (1H, m, 4-H), 5.08 (1H, d,  $J$  17.8, CH=CH<sub>cis</sub>H<sub>trans</sub>), 5.19 (1H, d,  $J$  10.9, CH=CH<sub>cis</sub>H<sub>trans</sub>), 5.76 (1H, ddd,  $J$  17.8, 10.9, 6.5, CH=CH<sub>2</sub>);  $\delta_C$  (125 MHz); 14.0 (CH<sub>3</sub>, CH<sub>3</sub>(CH<sub>2</sub>)<sub>3</sub>), 22.7 (CH<sub>2</sub>, CH<sub>3</sub>CH<sub>2</sub>), 27.7 (CH<sub>2</sub>, CH<sub>3</sub>CH<sub>2</sub>CH<sub>2</sub>), 35.7 (CH<sub>2</sub>, CH<sub>3</sub>(CH<sub>2</sub>)<sub>2</sub>CH<sub>2</sub>), 38.4 (CH<sub>2</sub>, C-3), 44.4 (CH, C-5), 65.3 (CH<sub>2</sub>, C-6), 66.6 (CH, C-4), 71.1 (CH, C-2), 117.4 (CH<sub>2</sub>, CH=CH<sub>2</sub>), 136.1 (CH, CH=CH<sub>2</sub>);  $m/z$  (EI) 184 ([M]<sup>+</sup>, 1%), 129 (10), 117 (22), 111 (14), 101 (4), 95 (7), 87 (56), 70 (68), 54 (100), 49 (10), 43 (12, [CH<sub>3</sub>(CH<sub>2</sub>)<sub>2</sub>]<sup>+</sup>); HRMS  $m/z$  (EI) 184.1461. C<sub>11</sub>H<sub>20</sub>O<sub>2</sub> requires 184.1463.

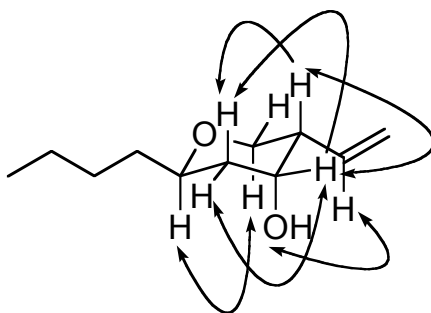

Selected nOes (GOESY) for **14b**.

**(2*R*\*, 4*R*\*, 5*S*\*) 2-iso-butyl-4-hydroxy-5-vinyl-tetrahydropyran (**14c**)**

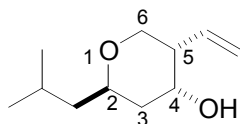

Aldehyde **7c** (0.180 g, 0.70 mmol) was reacted with MeSO<sub>3</sub>H (50  $\mu$ L, 0.77 mmol) according to the general procedure. After 45 min, work-up provided a mixture of alcohol diastereoisomers **14c** and **15c** (32:1 **14c**:**15c**, 95%). Flash column chromatography of this mixture afforded the major alcohol **14c** as a colourless oil (0.118 g, 87%);  $R_f$  = 0.26 (20% EtOAc in hexane);  $\nu_{\max}(\text{film})/\text{cm}^{-1}$  3427s br (OH), 3075w, 2955s, 2919s, 2870s, 2349w, 1640w (C=C), 1468m, 1421w, 1382m, 1368m, 1229m, 1171w, 1147m, 1113m, 1087s, 1053s, 999s, 958m, 917m, 877m, 840m, 786w, 713w, 665m;  $\delta_H$  (300 MHz) 0.90 (6H, d,  $J$  6.6, (CH<sub>3</sub>)<sub>2</sub>CH), 1.14 (1H, A of ABXY,  $J_{A-B}$  14.0,  $J_{A-X}$  8.5,  $J_{A-Y}$  4.4, <sup>*i*</sup>PrCH<sub>a</sub>H<sub>b</sub>), 1.24 (1H, s, OH), 1.37-1.56 (3H, stack including [1.50, ddd,  $J$  14.3, 11.4, 2.6, 3- $H_{ax}$ ], <sup>*i*</sup>PrCH<sub>a</sub>H<sub>b</sub>, 3- $H_{eq}$ , 3- $H_{ax}$ ), 1.72-1.83 (1H, m, (CH<sub>3</sub>)<sub>2</sub>CH), 2.41-2.52 (1H, m, 5- $H$ ), 3.69-3.81 (3H, stack, 2- $H$ , 6- $H_{ax}$ , 6- $H_{eq}$ ), 4.02-4.10 (1H, m, 4- $H$ ), 5.09 (1H, d with unresolved fine coupling,  $J$  17.6, CH=CH<sub>cis</sub>H<sub>trans</sub>), 5.21 (1H, d with unresolved fine coupling,  $J$  10.7, CH=CH<sub>cis</sub>H<sub>trans</sub>), 5.77 (1H, ddd,  $J$  17.6, 10.7, 6.6, CH=CH<sub>2</sub>);  $\delta_C$  (100 MHz) [22.3, 23.3, 24.4 (2 x CH<sub>3</sub>, 1 x CH, (CH<sub>3</sub>)<sub>2</sub>CH)], 38.9 (CH<sub>2</sub>, <sup>*i*</sup>PrCH<sub>2</sub>), 44.3 (CH, C-5), 45.2 (CH<sub>2</sub>, C-3), 65.2 (CH<sub>2</sub>, C-6),

66.7 (CH, C-4), 69.2 (C-2), 117.5 (CH<sub>2</sub>, CH=CH<sub>2</sub>), 136.1 (CH, CH=CH<sub>2</sub>); *m/z* (EI) 184 ([M]<sup>+</sup>, 1%), 127 (17), 117 (39), 111 (23), 95 (11), 87 (95), 70 (90), 54 (100), 43 (22); HRMS *m/z* (EI) 184.1455. C<sub>11</sub>H<sub>20</sub>O<sub>2</sub> requires 184.1463.

**(2*R*\*, 4*R*\*, 5*S*\*) 4-Hydroxy-2-methyl-5-vinyl-tetrahydropyran (**14d**)**

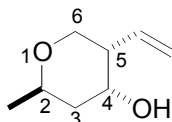

Aldehyde **7d** (0.240 g, 1.12 mmol) was reacted with MeSO<sub>3</sub>H (80 μL, 1.23 mmol) according to the general procedure. After 45 min, work-up provided a mixture of alcohol diastereoisomers **14d** and **15d** (7:1 **14d**:**15d**, 93%). Flash column chromatography of this mixture afforded the major alcohol **14d** as a colourless oil (0.131 g, 82%); *R<sub>f</sub>* = 0.18 (20% EtOAc in hexane); *v*<sub>max</sub>(film)/cm<sup>-1</sup> 3854w, 3745w, 3583w, 3583w, 3406s br (OH), 3066w, 3031w, 2922s, 2852s, 2360w, 2341w, 1963w, 1734w, 1734w, 1684w, 1640m (C=C), 1605w, 1559w, 1540w, 1496m, 1454m, 1420m, 1371m, 1249m, 1183m, 1142m, 1081m, 1081s, 1029s, 995m, 919m, 896m, 854m, 804w, 759m, 699s, 666s; δ<sub>H</sub> (300 MHz) 1.15 (3H, d, *J* 6.3, CH<sub>3</sub>), 1.50 (1H, ddd, *J* 13.9, 11.4, 2.7, 3-*H*<sub>ax</sub>), 1.70 (1H, s, OH), 1.80 (1H, d with unresolved fine coupling, *J* 13.9, 3-*H*<sub>eq</sub>), 2.37-2.53 (1H, m, 5-*H*), 3.62-3.92 (3H, stack, 2-*H*, 6-*H*<sub>ax</sub>, 6-*H*<sub>eq</sub>), 4.02-4.11 (1H, m, 4-*H*), 5.10 (1H, d with unresolved fine coupling, *J* 17.6, CH=CH<sub>cis</sub>*H*<sub>trans</sub>), 5.20 (1H, d with unresolved fine coupling, *J* 11.0, CH=CH<sub>cis</sub>*H*<sub>trans</sub>), 5.76 (1H, ddd, *J* 17.6, 11.0, 6.2, CH=CH<sub>2</sub>); δ<sub>C</sub> (75 MHz) 21.5 (CH<sub>3</sub>), 40.0 (CH<sub>2</sub>, C-3), 44.0 (CH, C-5), 65.2 (CH<sub>2</sub>, C-6), 66.6 (CH, C-2 or C-4), 67.2 (CH, C-2 or C-4), 117.5 (CH<sub>2</sub>, CH=CH<sub>2</sub>), 136.0 (CH, CH=CH<sub>2</sub>); *m/z* (EI) 142 ([M]<sup>+</sup>, 12%),

96 (8), 87 (35), 84 (27), 75 (37), 70 (68), 54 (100), 49 (5), 45 (46); HRMS  $m/z$  (EI) 142.0991.  $C_8H_{14}O_2$  requires 142.0994.

**(2*R*\*, 4*R*\*, 5*S*\*) 2-(2-Benzyloxyethyl)-4-hydroxy-5-vinyl-tetrahydropyran**  
**(14e)**

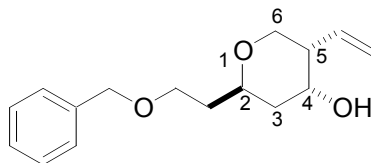

Aldehyde **7e** (0.200 g, 0.67 mmol) was reacted with  $MeSO_3H$  (48  $\mu L$ , 0.74 mmol) according to the general procedure. After 40 min, work-up provided a mixture of diastereoisomers **14e** and **15e** (12:1 **14e**:**15e**, 94%). Flash column chromatography of this mixture afforded the major alcohol **14e** as a colourless oil (0.142 g, 81%);  $R_f$  = 0.24 (20% EtOAc in hexane); (Found: C, 73.20; H, 8.32.  $C_{16}H_{22}O_3$  requires C, 73.25; H, 8.45%);  $\nu_{max}(\text{film})/\text{cm}^{-1}$  3583w, 3442s br (OH), 3067w, 3030w, 2917s, 2862s, 2362w, 1640m (C=C), 1496m, 1454m, 1422m, 1364m, 1220m, 1098s, 1051s, 1028m, 1000m, 918m, 871m, 802w, 738s, 698s, 666m;  $\delta_H$  (300 MHz) 1.55 (1H, ddd,  $J$  14.0, 11.4, 2.6, 3- $H_{ax}$ ), 1.63 (1H, s, OH), 1.70-1.87 (3H, stack, 3- $H_{eq}$ ,  $BnOCH_2CH_2$ ), 2.39-2.55 (1H, m, 5- $H$ ), 3.58 (2H, t,  $J$  6.6,  $BnOCH_2$ ), 3.66-3.80 (2H, stack, 6- $H_{ax}$ , 6- $H_{eq}$ ), 3.81-3.94 (1H, m, 2- $H$ ), 4.05-4.12 (1H, m, 4- $H$ ), 4.50 (2H, s,  $PhCH_2O$ ), 5.09 (1H, dt,  $J$  17.6, 1.5,  $CH=C_{cis}H_{trans}$ ), 5.21 (1H, d with unresolved fine coupling,  $J$  10.7,  $CH=CH_{cis}H_{trans}$ ), 5.77 (1H, ddd,  $J$  17.6, 10.7, 6.4,  $CH=CH_2$ ), 7.24-7.49 (5H, stack,  $PhH$ );  $\delta_C$  (75 MHz) 36.1 ( $CH_2$ ), 38.6 ( $CH_2$ ), 44.3 (CH, C-5), 65.3 ( $CH_2$ ), 66.5 (CH), 66.9 ( $CH_2$ ), 68.4 (CH), 72.9 ( $CH_2$ ,  $PhCH_2$ ), 117.4 ( $CH_2$ ,  $CH=CH_2$ ), 127.4 (CH, Ph), 127.6 (CH, Ph), 128.3 (CH, Ph), 136.0 (CH,  $CH=CH_2$ ), 138.5 (quat.

C, *ipso*Ph);  $m/z$  (TOF ES+) 285.2 ( $[M+Na]^+$ , 100%); HRMS  $m/z$  (TOF ES+) 285.1458.  $C_{16}H_{22}NaO_3$  requires 285.1467.

**(2*S*\*, 4*R*\*, 5*S*\*) 2-(tert-Butyl-diphenyl-silanyloxymethyl)-4-hydroxy-5-vinyl-tetrahydropyran (**14f**)**

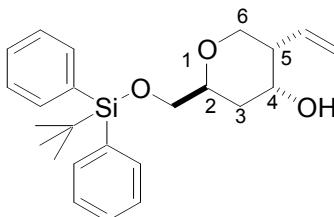

Aldehyde **7f** (0.150 g, 0.32 mmol) was reacted with  $MeSO_3H$  (23  $\mu$ L, 0.35 mmol) according to the general procedure. After 40 min, work-up provided a mixture of alcohol diastereoisomers **14f** and **15f** (18:1 **14f**:**15f**, 89%). Flash column chromatography of this mixture afforded the major alcohol **14f** as a colourless oil (0.104 g, 82%);  $R_f$  = 0.31 (20% EtOAc in hexane);  $\nu_{max}(\text{film})/\text{cm}^{-1}$  3444s br (OH), 3068w, 3031w, 2918s, 2863s, 1640w (C=C), 1496w, 1454m, 1422w, 1364m, 1204m, 1090s, 1050s, 1028m, 1000m, 918m, 871m, 803w, 737m, 698m, 666m;  $\delta_H$  (300 MHz) 1.07 (9H, s,  $C(CH_3)_3$ ), 1.28 (1H, d,  $J$  1.8, OH), 1.59-1.72 (1H, m, 3- $H_{ax}$ ), 1.88 (1H, d with unresolved fine coupling,  $J$  14.0, 3- $H_{eq}$ ), 2.41-2.56 (1H, m, 5- $H$ ), 3.61 (1H, A of ABX,  $J_{A-B}$  10.3,  $J_{A-X}$  5.1,  $SiOCH_aH_b$ ), 3.68-3.80 (3H, stack including [3.73, B of ABX,  $J_{B-A}$  10.3,  $J_{B-X}$  5.2,  $SiOCH_aH_b$ ), 6- $H$ ,  $SiOCH_aH_b$ ), 3.81-3.93 (1H, m, 2- $H$ ), 4.11-4.18 (1H, m, 4- $H$ ), 5.12 (1H, d with unresolved fine coupling,  $J$  17.6,  $CH=CH_{cis}H_{trans}$ ), 5.23 (1H, d with unresolved fine coupling,  $J$  10.7,  $CH=CH_{cis}H_{trans}$ ), 5.80 (1H, ddd,  $J$  17.6, 10.7, 6.6,  $CH=CH_2$ ), 7.33-7.45 (6H, stack, PhH), 7.65-7.72 (4H, stack, PhH);  $\delta_C$  (75 MHz) 19.3 (quat. C,  $C(CH_3)_3$ ), 26.9 ( $CH_3$ ,  $C(CH_3)_3$ ), 34.9 (CH, C-5), 44.2 ( $CH_2$ , C-3), 65.1 ( $CH_2$ ), 66.4 (CH, C-4), 67.0 ( $CH_2$ ), 71.7 (CH, C-2),

117.5 (CH<sub>2</sub>, CH=CH<sub>2</sub>), 127.6 (CH, Ph), 129.6 (CH, Ph), 133.7 (quat. C, *ipso*Ph), 135.6 (CH, Ph), 136.0 (CH, CH=CH<sub>2</sub>); *m/z* (TOF ES+) 419.2 ([M+Na]<sup>+</sup>, 100%); HRMS *m/z* (TOF ES+) 419.2009. C<sub>24</sub>H<sub>32</sub>NaO<sub>3</sub>Si requires 419.2018.

**(2*S*\*, 4*R*\*, 5*S*\*) 2-(Furan-2'-yl)-4-hydroxy-5-vinyl-tetrahydropyran (**14g**)**

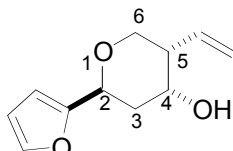

Aldehyde **7g** (0.125 g, 0.47 mmol) was reacted with MeSO<sub>3</sub>H (32 μL, 0.52 mmol) according to the general procedure. After 45 min, work-up provided a mixture of alcohol diastereoisomers **14g** and **15g** (25:1 **14g**:**15g**, 94%). Flash column chromatography of this mixture afforded the major alcohol **14g** as a colourless oil (78 mg, 86%); *R<sub>f</sub>* = 0.21 (20% EtOAc in hexane); *v*<sub>max</sub>(film)/cm<sup>-1</sup> 3417s br, 2951m, 2920m, 2865m, 1640m (C=C), 1500w, 1456w, 1408m, 1349m, 1314w, 1238m, 1216m, 1178w, 1152m, 1107m, 1076m, 1046s, 1006s, 954m, 934m, 875m, 836m, 812w, 753m, 666m; *δ*<sub>H</sub> (500 MHz) 1.71 (1H, s, OH), 2.02 (1H, app. dt, *J* 13.8, 2.9, 3-*H*<sub>eq</sub>), 2.11 (1H, ddd, *J* 13.8, 11.7, 2.8, 3-*H*<sub>ax</sub>), 2.51-2.60 (1H, m, 5-*H*), 3.80 (1H, dd, *J* 11.3, 2.8, 6-*H*<sub>eq</sub>), 3.92 (1H, app. t, *J* 11.3, 6-*H*<sub>ax</sub>), 4.13-4.20 (1H, m, 4-*H*), 4.82 (1H, dd, *J* 11.6, 2.4, 2-*H*), 5.12 (1H, d with unresolved fine coupling, *J* 17.8, CH=CH<sub>cis</sub>*H*<sub>trans</sub>), 5.22 (1H, d with unresolved fine coupling, *J* 10.7, CH=CH<sub>cis</sub>*H*<sub>trans</sub>), 5.79 (1H, ddd, *J* 17.8, 10.7, 6.6, CH=CH<sub>2</sub>), 6.25 (1H, d, *J* 3.1, furyl CCH), 6.29-6.31 (1H, m, furyl CH), 6.36 (1H, d, *J* 1.4, OCH<sub>2</sub>); *δ*<sub>C</sub> (125 MHz) 36.1 (CH<sub>2</sub>, C-3), 43.9 (CH, C-5), 65.6 (CH<sub>2</sub>, C-6), 66.2 (CH, C-4), 66.8 (CH, C-2), 106.8 (CH, furyl CCH), 110.1 (CH, furyl OCHCH), 117.9 (CH<sub>2</sub>, CH=CH<sub>2</sub>), 135.6 (CH, CH=CH<sub>2</sub>), 142.3 (CH, furyl OCH), 154.5 (quat. C, furyl C); *m/z* (EI) 194 ([M]<sup>+</sup>, 11%), 147 (7), 138 (7), 122

(9), 110 (28), 95 (100), 86 (10), 81 (27), 77 (9), 70 (11), 66 (33), 55 (40), 49 (37), 43 (18); HRMS  $m/z$  (EI) 194.0952.  $C_{11}H_{14}O_3$  requires 194.0943.

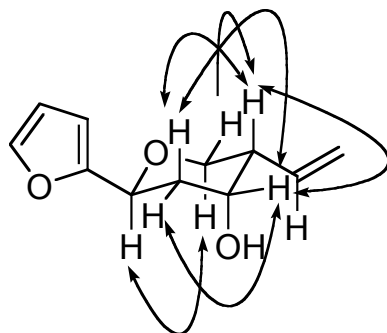

Selected nOes (GOESY) for **14g**.

**(*E*, 2*S*<sup>\*</sup>, 4*R*<sup>\*</sup>, 5*R*<sup>\*</sup>) 4-Hydroxy-2-styryl-5-vinyl-tetrahydropyran (**14h**)**

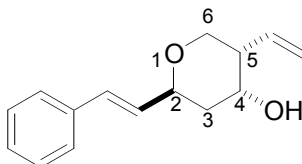

Aldehyde **7h** (0.215 g, 0.71 mmol) was reacted with  $MeSO_3H$  (51  $\mu L$ , 0.78 mmol) according to the general procedure. After 40 min, work-up provided a mixture of alcohol diastereoisomers **14h** and **15h** (19:1 **14h**:**15h**, quantitative yield). Flash column chromatography of this mixture afforded the major alcohol **14h** as a yellow oil (0.137 g, 84%);  $R_f$  = 0.23 (20% EtOAc in hexane);  $\nu_{max}(\text{film})/\text{cm}^{-1}$  3583w, 3403s br (OH), 3081m, 3027s, 2919s, 2862s, 2360w, 2341w, 1951w, 1880w, 1718w, 1639m (C=C), 1598w, 1578w, 1495m, 1448m, 1421m, 1355m, 1266m, 1241m, 1201m, 1072s, 997s, 968s, 919m, 875m, 833w, 793w, 740s, 692s, 666s;  $\delta_H$  (500 MHz) 1.66 (1H, s, OH), 1.74 (1H, app. t with unresolved fine coupling,  $J$  12.6, 3- $H_{ax}$ ),

1.97 (1H, app. dt,  $J$  12.6, 2.6, 3- $H_{eq}$ ), 2.51-2.60 (1H, m, 5- $H$ ), 3.79-3.94 (2H, stack, 6- $H_{ax}$ , 6- $H_{eq}$ ), 4.13-4.19 (1H, m, 4- $H$ ), 4.43 (1H, app. dd,  $J$  12.6, 6.0, 2- $H$ ), 5.15 (1H, d,  $J$  17.6,  $CH=C_{cis}H_{trans}$ ), 5.25 (1H, d,  $J$  10.9,  $CH=CH_{cis}H_{trans}$ ), 5.81 (1H, ddd,  $J$  17.6, 10.9, 6.4,  $CH=CH_2$ ), 6.19 (1H, dd,  $J$  16.1, 6.0,  $PhCH=CH$ ), 6.63 (1H, d,  $J$  16.1,  $PhCH=CH$ ), 7.22 (1H, t,  $J$  7.3,  $p$ - $PhH$ ), 7.30 (2H, app. t,  $J$  7.6,  $m$ - $PhH$ ), 7.38 (2H, d,  $J$  7.4,  $o$ - $PhH$ );  $\delta_C$  (125 MHz) 38.6 ( $CH_2$ , C-3), 44.0 ( $CH$ , C-5), 65.2 ( $CH_2$ , C-6), 66.4 ( $CH$ , C-4), 71.6 ( $CH$ , C-2), 117.8 ( $CH_2$ ,  $CH=CH_2$ ), 126.4 ( $CH$ , Ph), 127.5 ( $CH$ , Ph), 128.5 ( $CH$ , Ph), 130.0 ( $CH$ ,  $PhCH=CH$ ), 130.4 ( $CH$ ,  $PhCH=CH$ ), 135.8 ( $CH$ ,  $CH=CH_2$ ), 136.9 (quat. C, *ipso*Ph);  $m/z$  (TOF ES+) 285.1 ( $[M+Na+MeOH]^+$ , 20%), 253.1 (100,  $[M+Na]^+$ ); HRMS  $m/z$  (TOF ES+) 253.1200.  $C_{15}H_{18}NaO_2$  requires 253.1204.

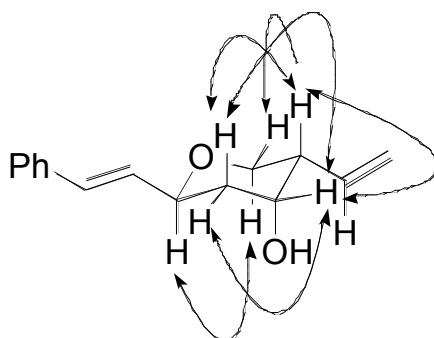

Selected nOes (GOESY) for **14h**.

**(2S\*, 4S\*, 5S\*) 4-Hydroxy-2-phenyl-5-vinyl-tetrahydropyran (15a)**

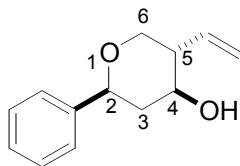

Dess-Martin periodinane (0.438 g, 1.03 mmol) was added to a solution of alcohols **14a** and **15a** (crude allylation product) (0.140 g, 0.69 mmol) in CH<sub>2</sub>Cl<sub>2</sub> (7 mL) at rt and the reaction mixture was stirred for 1 h. The reaction was then quenched with NaHCO<sub>3</sub> solution (3.5 mL) and sodium thiosulfate solution (3.5 mL) and stirred for a further 30 min. The phases were separated and the aqueous phase was extracted with CH<sub>2</sub>Cl<sub>2</sub> (2 x 7 mL). The combined organic extracts were washed with water (7 mL) and brine (7 mL) and dried over MgSO<sub>4</sub>. Filtration and evaporation under reduced pressure produced a residue which was dissolved in Et<sub>2</sub>O (6 mL). NaBH<sub>4</sub> (52 mg, 1.38 mmol) was added and the reaction mixture was stirred at rt for 5 h. The reaction was then quenched with NH<sub>4</sub>Cl solution (7 mL) and stirred for 30 min. The phases were separated and the aqueous phase was extracted with Et<sub>2</sub>O (2 x 7 mL). The combined organic extracts were washed with water (6 mL) and brine (6 mL) and dried over MgSO<sub>4</sub>. Evaporation under reduced pressure produced alcohol **15a** as a colourless oil (0.122 g, 87%); *R<sub>f</sub>* = 0.17 (20% EtOAc in hexane);  $\nu_{\text{max}}(\text{film})/\text{cm}^{-1}$  3583w, 3408s br (OH), 3066w, 3031w, 2911m, 2840m, 2359w, 1640m (C=C), 1605w, 1496m, 1453m, 1371m, 1215w, 1283w, 1141m, 1070s, 1028s, 992m, 917m, 896m, 855w, 803w, 759s, 733m, 699m, 655m;  $\delta_{\text{H}}$  (300 MHz) 1.64 (1H, app. q, *J* 11.8, 3-*H<sub>ax</sub>*), 1.89 (1H, s, OH), 2.21-2.40 (2H, stack including [2.25 (1H, ddd, *J* 11.8, 4.5, 2.0, 3-*H<sub>eq</sub>*), 3-*H<sub>eq</sub>*, 5-H), 3.40 (1H, app. t, *J* 11.4, 6-*H<sub>ax</sub>*), 3.70 (1H, app. td, *J* 10.3, 4.5, 4-H), 4.05 (1H, dd, *J* 11.4, 4.8, 6-*H<sub>eq</sub>*), 4.40 (1H, dd, *J* 11.8, 2.0, 2-H), 5.24-5.39 (2H, stack, CH=CH<sub>2</sub>), 5.54-5.75 (1H, m, CH=CH<sub>2</sub>), 7.21-7.43 (5H, stack,

PhH);  $\delta_{\text{C}}$  (75 MHz) 41.1 (CH<sub>2</sub>, C-3), 50.2 (CH, C-5), 70.0 (CH<sub>2</sub>, C-6), 71.1 (CH, C-4), 78.8 (CH, C-2), 119.8 (CH<sub>2</sub>, CH=CH<sub>2</sub>), 125.9 (CH, Ph), 127.7 (CH, Ph), 128.4 (CH, Ph), 135.0 (CH, CH=CH<sub>2</sub>), 141.6 (quat. C, *ipso*Ph); *m/z* (EI) 204 ([M]<sup>+</sup>, 7%), 159 (11), 148 (10), 120 (40), 105 (100), 91 (11, [PhCH<sub>2</sub>]<sup>+</sup>), 77 (28, [Ph]<sup>+</sup>), 70 (91), 54 (76), 43 (8); HRMS *m/z* (EI) 204.1144. C<sub>13</sub>H<sub>16</sub>O<sub>2</sub> requires 204.1150.

**(2*R*\*, 4*S*\*, 5*S*\*) 2-Butyl-4-hydroxy-5-vinyl-tetrahydropyran (**15b**)**

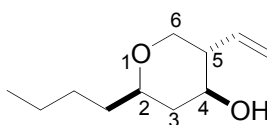

Dess-Martin periodinane (0.382 g, 0.90 mmol) was added to a solution of tetrahydropyrans **14a** and **15b** (crude allylation product) (0.110 g, 0.60 mmol) in CH<sub>2</sub>Cl<sub>2</sub> (6 mL) at rt and the reaction mixture was stirred for 1 h. The reaction was then quenched with NaHCO<sub>3</sub> solution (3 mL) and sodium thiosulfate solution (3 mL) and stirred for a further 30 min. The phases were separated and the aqueous phase was extracted with CH<sub>2</sub>Cl<sub>2</sub> (2 x 6 mL). The combined organic extracts were washed with water (6 mL) and brine (6 mL) and dried over MgSO<sub>4</sub>. Filtration and evaporation under reduced pressure produced a residue which was dissolved in Et<sub>2</sub>O (6 mL). NaBH<sub>4</sub> (45 mg, 1.20 mmol) was added and the reaction mixture was stirred at RT for 5 h. The reaction was then quenched with NH<sub>4</sub>Cl solution (6 mL) and stirred for 30 min. The phases were separated and the aqueous phase was extracted with Et<sub>2</sub>O (2 x 6 mL). The combined organic extracts were washed with water (6 mL) and brine (6 mL) and dried over MgSO<sub>4</sub>. Evaporation under reduced pressure produced alcohols **15b** and **14b** (15:1 **15b**:**14b**). Flash column chromatography afforded the major alcohol **15b** as a colourless oil (91 mg, 83%); *R<sub>f</sub>* = 0.18 (20% EtOAc in

hexane);  $\nu_{\max}(\text{film})/\text{cm}^{-1}$  3583m, 3405s br (OH), 3080w, 3056s, 2933s, 2860s, 1642m (C=C), 1460m, 1378m, 1248w, 1143m, 1084s, 1036m, 992m, 917m, 862w, 803w, 778w, 666m;  $\delta_{\text{H}}$  (300 MHz) 0.88 (3H, t,  $J$  7.0,  $\text{CH}_3$ ), 1.18-1.68 (7H, stack,  $\text{CH}_3(\text{CH}_2)_3$ , 3- $H_{\text{ax}}$ ), 1.87 (1H, s, OH), 1.99 (1H, ddd,  $J$  12.6, 4.6, 1.9, 3- $H_{\text{eq}}$ ), 2.16 (1H, app. qd,  $J$  11.0, 4.6, 5-H), 3.18 (1H, app. t,  $J$  11.0, 6- $H_{\text{ax}}$ ), 3.23-3.48 (1H, m, 2-H), 3.50 (1H, app. td,  $J$  11.0, 4.6, 4-H), 3.86 (1H, dd,  $J$  11.0, 4.6, 6- $H_{\text{eq}}$ ), 5.18-5.32 (2H, stack,  $\text{CH}=\text{CH}_2$ ), 4.47-6.64 (1H, m,  $\text{CH}=\text{CH}_2$ );  $\delta_{\text{C}}$  (75 MHz) 14.0 ( $\text{CH}_3$ ,  $\text{CH}_3(\text{CH}_2)_3$ ), 22.6 ( $\text{CH}_2$ ,  $\text{CH}_3\text{CH}_2$ ), 27.6 ( $\text{CH}_2$ ,  $\text{CH}_3\text{CH}_2\text{CH}_2$ ), 35.7 ( $\text{CH}_2$ ,  $\text{CH}_3(\text{CH}_2)_2\text{CH}_2$ ), 39.4 ( $\text{CH}_2$ , C-3), 50.4 (CH, C-5), 69.6 ( $\text{CH}_2$ , C-6), 70.9 (CH, C-4), 76.6 (CH, C-2), 119.4 ( $\text{CH}_2$ ,  $\text{CH}=\text{CH}_2$ ), 135.3 (CH,  $\text{CH}=\text{CH}_2$ );  $m/z$  (EI) 184 ( $[\text{M}]^+$ , 3%), 127 (12), 117 (24), 111 (14), 99 (3), 95 (7), 87 (74), 79 (22), 70 (87), 58 (3), 54 (100), 49 (20), 43 (17); HRMS  $m/z$  (EI) 184.1470.  $\text{C}_{11}\text{H}_{20}\text{O}_2$  requires 184.1463.

### 3-Phenyl-3-(4-trimethylsilanyl-but-2-ynyl)oxypropionaldehyde (**16a**)

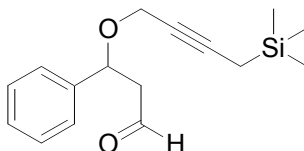

Aldehyde **16a** was prepared from ester **12a** (0.263 g, 0.88 mmol) and DIBALH (0.65 mL of a 1.5 M solution in toluene, 0.97 mmol) according to the general procedure. After 1 h, work-up and purification by flash column chromatography (6%  $\text{Et}_2\text{O}$  in hexane) afforded aldehyde **16a** as a colourless oil (0.229 g, 95%);  $R_f$  = 0.23 (6%  $\text{EtOAc}$  in hexane);  $\nu_{\max}(\text{film})/\text{cm}^{-1}$  3583w, 3436w, 3063w, 3031w, 2956s, 2898m, 2856m, 2725w, 2335w, 2213m ( $\text{C}\equiv\text{C}$ ), 1727s ( $\text{C}=\text{O}$ ), 1681m, 1627w, 1494m, 1454m, 1396m, 1356m, 1307w, 1250s, 1169w, 1126m, 1066s, 1044s, 852s, 791w, 762m, 701s, 666m;  $\delta_{\text{H}}$  (300 MHz) 0.11 (9H, s,  $\text{Si}(\text{CH}_3)_3$ ), 1.47-1.54 (2H, m,

$\text{CH}_2\text{Si}(\text{CH}_3)_3$ , 2.65 (1H, A of ABXY,  $J_{\text{A-B}}$  16.4,  $J_{\text{A-X}}$  4.5,  $J_{\text{A-Y}}$  1.7,  $\text{CH}_a\text{H}_b\text{C}=\text{O}$ ), 2.91 (1H, B of ABXY,  $J_{\text{B-A}}$  16.4,  $J_{\text{B-X}}$  9.0,  $J_{\text{B-Y}}$  2.6,  $\text{CH}_a\text{H}_b\text{C}=\text{O}$ ), 3.87 (1H, A of ABX<sub>2</sub>,  $J_{\text{A-B}}$  15.3,  $J_{\text{A-X}}$  2.4,  $\text{CH}_a\text{H}_b\text{C}\equiv\text{C}$ ), 4.12 (1H, B of ABX<sub>2</sub>,  $J_{\text{B-A}}$  15.3,  $J_{\text{B-X}}$  2.4,  $\text{CH}_a\text{H}_b\text{C}\equiv\text{C}$ ), 5.09 (1H, dd,  $J$  8.8, 4.4, 3-*H*), 7.21-7.45 (5H, stack, Ph*H*), 9.76-9.83 (1H, m, CHO);  $\delta_{\text{C}}$  (75 MHz) -2.0 (CH<sub>3</sub>, Si(CH<sub>3</sub>)<sub>3</sub>), 7.2 (CH<sub>2</sub>, C $\equiv$ CCH<sub>2</sub>Si), 51.2 (CH<sub>2</sub>, CH<sub>2</sub>C=O), 56.4 (CH<sub>2</sub>, OCH<sub>2</sub>C $\equiv$ C), 74.2 (quat. C, C $\equiv$ C), 74.8 (CH, C-3), 85.2 (quat. C, C $\equiv$ C), 126.7 (CH, Ph), 128.2 (CH, Ph), 128.7 (CH, Ph), 139.8 (quat. C, *ipso*Ph), 200.6 (CH, C=O);  $m/z$  (TOF ES+) 329.2 ([M+Na+MeOH]<sup>+</sup>, 100%), 297.2 (53, [M+Na]<sup>+</sup>); HRMS  $m/z$  (TOF ES+) 297.1275. C<sub>16</sub>H<sub>22</sub>O<sub>2</sub>NaSi requires 297.1287.

### 3-(4-Trimethylsilanyl-but-2-ynyloxy)heptanal (**16b**)

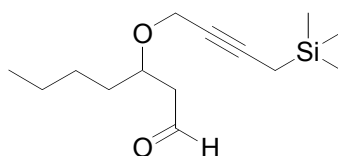

Aldehyde **16b** was prepared from ester **12b** (0.293 g, 0.98 mmol) and DIBALH (0.72 mL of a 1.5 M solution in toluene, 1.08 mmol) according to the general procedure. After 1 h, work-up and purification by flash column chromatography (6% Et<sub>2</sub>O in hexane) afforded aldehyde **16b** as a colourless oil (0.239 g, 96%);  $R_f$  = 0.21 (6%EtOAc in hexane);  $\nu_{\text{max}}$ (film)/cm<sup>-1</sup> 3583w, 3429w, 2957s, 2861m, 2360w, 2340w, 2212w (C $\equiv$ C), 1726s (C=O), 1458w, 1350w, 1250s, 1169w, 1126m, 1060m, 852s, 791w, 698w, 666m;  $\delta_{\text{H}}$  (300 MHz) 0.10 (9H, s, Si(CH<sub>3</sub>)<sub>3</sub>), 0.82-0.99 (3H, m, CH<sub>3</sub>), 1.12-1.44 (4H, stack, CH<sub>3</sub>(CH<sub>2</sub>)<sub>2</sub>CH<sub>2</sub>), 1.47-1.79 (4H, stack including [1.50 (2H, t,  $J$  2.4, CH<sub>2</sub>Si(CH<sub>3</sub>)<sub>3</sub>), CH<sub>3</sub>(CH<sub>2</sub>)<sub>2</sub>CH<sub>2</sub>, CH<sub>2</sub>Si(CH<sub>3</sub>)<sub>3</sub>), 2.57 (1H, A of ABXY,  $J_{\text{A-B}}$  16.3,  $J_{\text{A-X}}$  5.1,  $J_{\text{A-Y}}$  2.2,  $\text{CH}_a\text{H}_b\text{C}=\text{O}$ ), 2.62 (1H, B of ABXY,  $J_{\text{B-A}}$  16.3,  $J_{\text{B-X}}$  6.8,  $J_{\text{B-Y}}$  2.6,  $\text{CH}_a\text{H}_b\text{C}=\text{O}$ ), 4.04 (1H, app. quintet,  $J$  6.0, 3-*H*), 4.18 (2H, t,  $J$  2.4, OCH<sub>2</sub>CH=CH),

9.82 (1H, t,  $J$  2.4, CHO);  $\delta_C$  (75 MHz) -2.6 (CH<sub>3</sub>, Si(CH<sub>3</sub>)<sub>3</sub>), 6.6 (CH<sub>2</sub>, C $\equiv$ CCH<sub>2</sub>Si), 13.5 (CH<sub>3</sub>), 22.2 (CH<sub>2</sub>), 26.8 (CH<sub>2</sub>), 33.4 (CH<sub>2</sub>), 47.7 (CH<sub>2</sub>, CH<sub>2</sub>C=O), 56.8 (OCH<sub>2</sub>C $\equiv$ C), 73.0 (CH, C-3), 74.6 (quat. C, C $\equiv$ C), 84.7 (quat. C, C $\equiv$ C), 202.4 (CH, C=O). Satisfactory mass spectra could not be obtained on this compound.

**(2S\*, 4R\*) 4-Hydroxy-2-phenyl-5-vinylidene-tetrahydropyran (17a)**

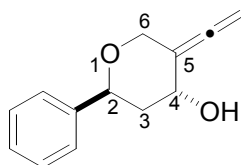

MeSO<sub>3</sub>H (61  $\mu$ L, 0.94 mmol) was added to a solution of aldehyde **16a** (0.235 g, 0.86 mmol) in CH<sub>2</sub>Cl<sub>2</sub> (8.6 mL) at -78 °C. After 2 min, work-up as described for the formation of **14**, and purification by flash column chromatography (20% EtOAc in hexane) afforded allene **17a** as a colourless oil (0.153 g, 88%);  $R_f$  = 0.22 (20% EtOAc in hexane);  $\nu_{\max}$ (film)/cm<sup>-1</sup> 3583w, 3412s br (OH), 3063w, 3032w, 2921m, 2850m, 2359w, 1962s (C=C=C), 1724w, 1605w, 1495w, 1495w, 1454s, 1371m, 1328w, 1252m, 1204m, 1174w, 1062s, 1003m, 906w, 886m, 853s, 774w, 757m, 700s, 666s;  $\delta_H$  (500 MHz) 1.90 (1H, s, OH), 1.94-2.02 (1H, m, 3- $H_{ax}$ ), 2.06 (1H, app. dt,  $J$  13.1, 3.1, 3- $H_{eq}$ ), 4.34 (1H, d,  $J$  12.2, 6- $H_{eq}$ ), 4.61 (1H, dt,  $J$  12.2, 3.0, 6- $H_{ax}$ ), 4.65 (1H, app. t,  $J$  2.7, 4- $H$ ), 4.80 (1H, A of ABX,  $J_{A-B}$  13.1,  $J_{A-X}$  3.1, C=C=CH<sub>a</sub>H<sub>b</sub>), 4.86-4.98 (2H, stack, 2- $H$ , C=C=CH<sub>a</sub>H<sub>b</sub>), 7.24-7.28 (2H, m,  $m$ -PhH), 7.29-7.39 (3H, stack,  $o$ -PhH,  $p$ -PhH);  $\delta_C$  (125 MHz) 40.7 (CH<sub>2</sub>, C-3), 65.5 (CH<sub>2</sub>, C-6), 67.4 (CH, C-4), 73.9 (CH, C-2), 76.3 (CH<sub>2</sub>, C=C=CH<sub>2</sub>), 98.9 (quat. C, C=C=CH<sub>2</sub>), 125.9 (CH, Ph), 127.6 (CH, Ph), 128.4 (CH, Ph), 142.0 (quat. C,  $ipso$ Ph), 203.2 (quat. C, C=C=CH<sub>2</sub>);  $m/z$  (EI) 202 ([M<sup>+</sup>], 1%), 184 (100, [M - H<sub>2</sub>O]<sup>+</sup>), 155 (3), 141 (3), 133 (6), 128 (10),

105 (92), 91 (6, [PhCH<sub>2</sub>]<sup>+</sup>), 77 (19, [Ph]<sup>+</sup>), 68 (38), 51 (27), 43 (10); HRMS *m/z* (EI) 202.0985. C<sub>13</sub>H<sub>14</sub>O<sub>2</sub> requires 202.0994.

**(2*R*\*, 4*R*\*) 2-Butyl-4-hydroxy-5-vinylidene-tetrahydropyran (17b)**

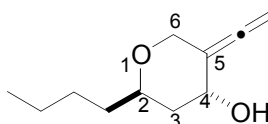

MeSO<sub>3</sub>H (56 μL, 0.86 mmol) was added to a solution of aldehyde **16b** (0.200 g, 0.79 mmol) in CH<sub>2</sub>Cl<sub>2</sub> (7.9 mL) at -78 °C. After 2 min, work-up as described for the formation of **14**, provided a mixture of allenes **17b** and **18b** (10:1 **17b**:**18b**, 94%). Purification by flash column chromatography (20% EtOAc in hexane) afforded the major allene **17b** as a colourless oil (0.124 g, 86%); *R<sub>f</sub>* = 0.23 (20% EtOAc in hexane); *v*<sub>max</sub>(film)/cm<sup>-1</sup> 3416s br (OH), 2956s, 2931s, 2860m, 2361w, 1963s (C=C=C), 1711w, 1658w, 1642w, 1549w, 1453m, 1377m, 1327m, 1268m, 1210m, 1176m, 1088s, 1061s, 1037s, 845m, 792w, 772w, 732w; *δ*<sub>H</sub> (300 MHz) 0.89 (3H, t, *J* 7.0, CH<sub>3</sub>), 1.22-1.56 (6H, stack, CH<sub>3</sub>(CH<sub>2</sub>)<sub>3</sub>), 1.63 (1H, ddd, *J* 13.2, 11.2, 3.3, 3-*H*<sub>ax</sub>), 1.71 (1H, s, OH), 1.83 (1H, dt, *J* 13.2, 2.8, 3-*H*<sub>eq</sub>), 3.72-3.86 (1H, m, 2-*H*), 4.18 (1H, d, *J* 12.2, 6-*H*<sub>eq</sub>), 4.41 (1H, dt *J* 12.2, 3.4, 6-*H*<sub>ax</sub>), 4.57 (1H, app. t, *J* 2.8, 4-*H*), 4.74 (1H, A of ABX, *J*<sub>A-B</sub> 10.8, *J*<sub>A-X</sub> 3.5, C=C=CH<sub>a</sub>H<sub>b</sub>), 4.82 (1H, B of ABX, *J*<sub>B-A</sub> 10.8, *J*<sub>B-X</sub> 3.1, C=C=CH<sub>a</sub>H<sub>b</sub>); *δ*<sub>C</sub> (75 MHz) 13.6 (CH<sub>3</sub>, CH<sub>3</sub>(CH<sub>2</sub>)<sub>3</sub>), 22.4 (CH<sub>2</sub>, CH<sub>3</sub>CH<sub>2</sub>), 27.3 (CH<sub>2</sub>, CH<sub>3</sub>CH<sub>2</sub>CH<sub>2</sub>), 35.2 (CH<sub>2</sub>, CH<sub>3</sub>(CH<sub>2</sub>)<sub>2</sub>CH<sub>2</sub>), 38.7 (CH<sub>2</sub>, C-3), 65.0 (CH<sub>2</sub>, C-6), 67.2 (CH, C-4), 71.7 (CH, C-2), 76.0 (CH<sub>2</sub>, C=C=CH<sub>2</sub>), 99.5 (quat. C, C=C=CH<sub>2</sub>), 203.9 (C=C=CH<sub>2</sub>); *m/z* (EI) 182 ([M]<sup>+</sup>, 6%), 164 (33, [M - H<sub>2</sub>O]<sup>+</sup>), 135 (7), 131 (10), 125 (74), 122 (24), 117 (11), 113 (8), 107 (30), 99 (14), 96 (100), 91 (40); HRMS *m/z* (EI) 182.1301. C<sub>11</sub>H<sub>18</sub>O<sub>2</sub> requires 182.1307.
